# Supplementary material for: A human in vitro neuronal model for studying homeostatic plasticity at the network level
Source: PubMed Central journal article supplement — Stem Cell Reports. 2023 Oct 19;18(11):2222–39. doi: 10.1016/j.stemcr.2023.09.011 (PMC10679660; doi:10.1016/j.stemcr.2023.09.011), 2023-10-19
Supplement: mmc5.pdf [file mmc5.pdf]

## A human *in vitro* neuronal model for studying homeostatic plasticity at the network level

Xiuming Yuan,<sup>1</sup> Sofía Puvogel,<sup>1</sup> Jon-Ruben van Rhijn,<sup>2</sup> Umami Ciptasari,<sup>1</sup> Anna Esteve-Codina,<sup>3,4</sup> Mandy Meijer,<sup>1</sup> Simon Rouschop,<sup>1</sup> Eline J.H. van Hugte,<sup>1</sup> Astrid Oudakker,<sup>1</sup> Chantal Schoenmaker,<sup>1</sup> Monica Frega,<sup>5</sup> Dirk Schubert,<sup>2</sup> Barbara Franke,<sup>1,2,6</sup> and Nael Nadif Kasri<sup>1,2,6,\*</sup>

<sup>1</sup>Department of Human Genetics, Radboud University Medical Center, Donders Institute for Brain, Cognition and Behaviour, 6500 HB Nijmegen, the Netherlands

<sup>2</sup>Department of Cognitive Neuroscience, Radboud University Medical Center, Donders Institute for Brain, Cognition and Behaviour, 6500 HB Nijmegen, the Netherlands

<sup>3</sup>CNAG-CRG, Centre for Genomic Regulation, Barcelona Institute of Science and Technology, 08028 Barcelona, Spain

<sup>4</sup>Universitat Pompeu Fabra (UPF), 08002 Barcelona, Spain

<sup>5</sup>Department of Clinical Neurophysiology, University of Twente, 7522 NB Enschede, the Netherlands

<sup>6</sup>These authors contributed equally

\*Correspondence: [n.nadif@donders.ru.nl](mailto:n.nadif@donders.ru.nl)

<https://doi.org/10.1016/j.stemcr.2023.09.011>

### SUMMARY

Mechanisms that underlie homeostatic plasticity have been extensively investigated at single-cell levels in animal models, but are less well understood at the network level. Here, we used microelectrode arrays to characterize neuronal networks following induction of homeostatic plasticity in human induced pluripotent stem cell (hiPSC)-derived glutamatergic neurons co-cultured with rat astrocytes. Chronic suppression of neuronal activity through tetrodotoxin (TTX) elicited a time-dependent network re-arrangement. Increased expression of AMPA receptors and the elongation of axon initial segments were associated with increased network excitability following TTX treatment. Transcriptomic profiling of TTX-treated neurons revealed up-regulated genes related to extracellular matrix organization, while down-regulated genes related to cell communication; also astrocytic gene expression was found altered. Overall, our study shows that hiPSC-derived neuronal networks provide a reliable *in vitro* platform to measure and characterize homeostatic plasticity at network and single-cell levels; this platform can be extended to investigate altered homeostatic plasticity in brain disorders.

### INTRODUCTION

In the healthy brain, neuronal activity adapts dynamically to a changing environment. Two principal mechanisms accommodate such adaptive behavior: Hebbian plasticity and homeostatic plasticity. Traditional forms of Hebbian plasticity, such as long-term potentiation (LTP) and long-term depression (LTD), induce changes in the strength of individual synaptic connections and constitute the biological substrate of learning and memory consolidation. However, without effective negative feedback regulation, their effects could cause a destabilization of neuronal networks (Fox and Stryker, 2017). Homeostatic plasticity is a negative feedback mechanism that stabilizes neuronal network activity by adjusting synaptic strength and intrinsic properties of the neurons in response to activity perturbations during learning and development. Eventually, the homeostatic changes that occur through these mechanisms prevent the neuronal networks from becoming hypo- or hyper-active (Tien and Kerschensteiner, 2018; Wefelmeyer et al., 2016; Turrigiano, 2012; Watt and Desai, 2010). As such, homeostatic plasticity mechanisms play a critical role in the correct functioning of the nervous system (Antoine et al., 2019). Previous studies identified disrupted homeostatic plasticity in rodent models for different neurode-

velopmental disorders (NDDs), such as Fragile X syndrome, Kleefstra syndrome, Rett syndrome, and tuberous sclerosis, suggesting that altered or insufficient homeostatic plasticity during development contributes to cognitive and behavioral impairments that characterize NDDs (Bulow et al., 2019; Lee et al., 2018; Benevento et al., 2016; Dani et al., 2005; Zeng et al., 2007; Antoine et al., 2019).

While homeostatic plasticity mechanisms have been well characterized at the single-cell level, using rodent dissociated-cell cultures and organotypic slice cultures (Moulin et al., 2020; Debanne et al., 2019; Debanne and Russier, 2019), homeostatic plasticity at the network level is poorly understood. In addition, it remains unclear how intrinsic properties and synaptic strength cooperate to stabilize neuronal networks in response to changes in activity levels (Antoine et al., 2019; Turrigiano, 2011). Thus, establishing a framework to assess homeostatic plasticity at the network level in a human model is essential for a better understanding of human neurodevelopment and neuronal function, both in normal and pathological conditions.

Human induced pluripotent stem cell (hiPSC)-derived neuronal models allow for the generation of networks of controllable cellular composition that contain spontaneously active and synaptically connected neurons in a patient-specific background (Frega et al., 2017; Bardy et al.,

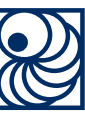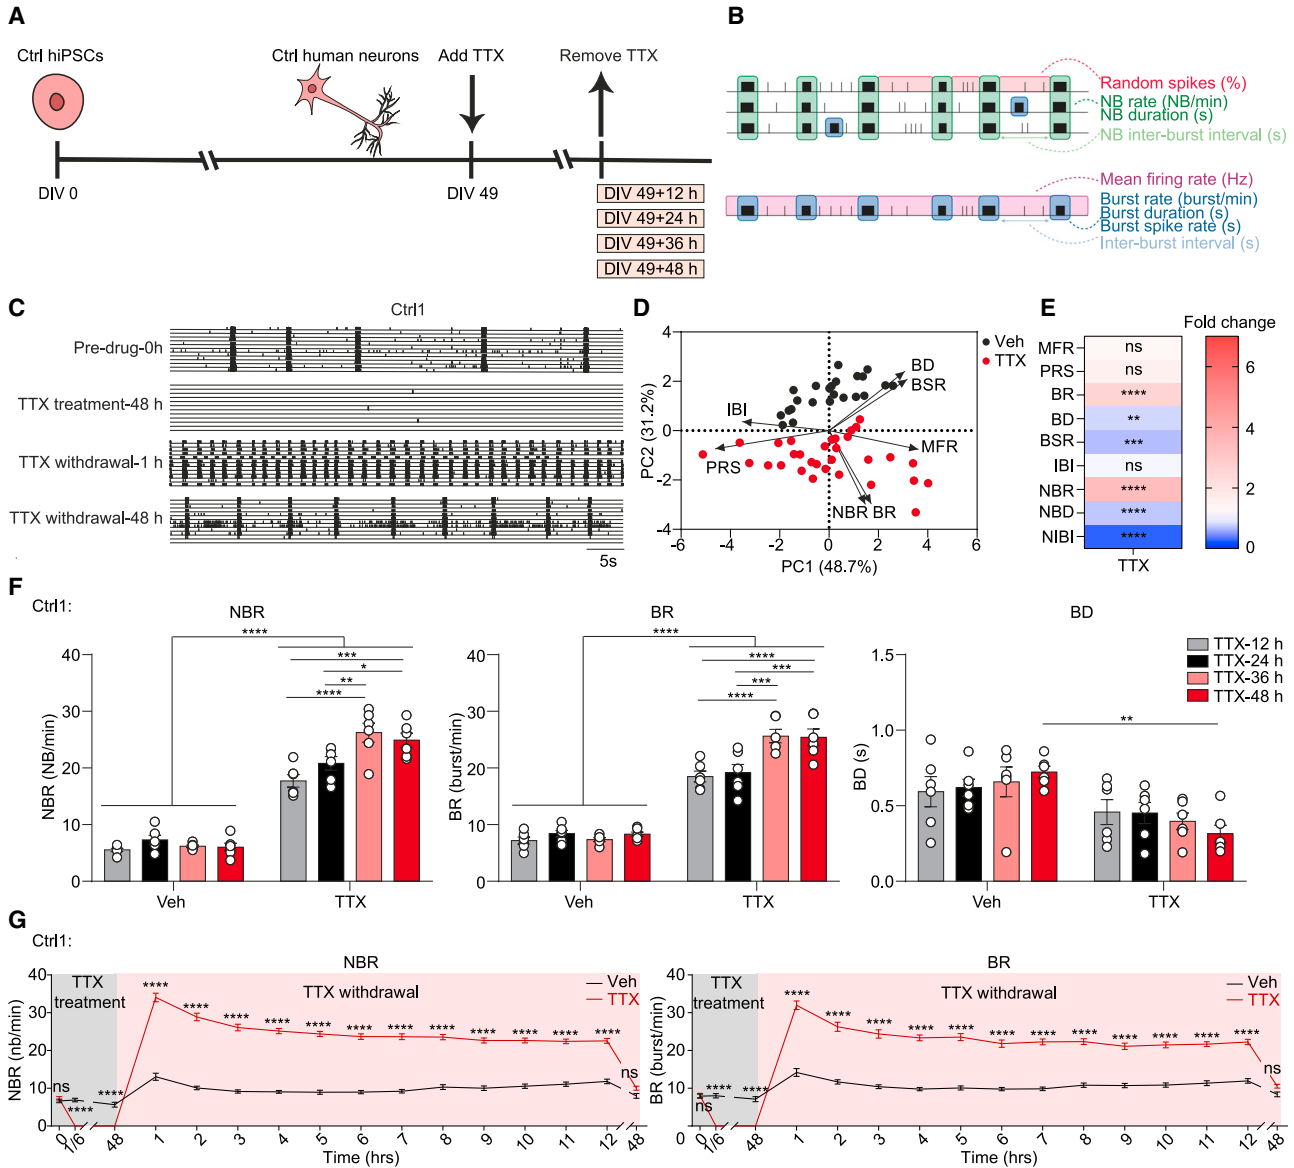

**Figure 1. Tetrodotoxin (TTX)-treated neurons show a time-dependent re-arrangement of the networks**

(A) Schematic representation of human induced pluripotent stem cell (hiPSC) differentiation and TTX treatment workflow.

(B) Schematic overview of extracted parameters from microelectrode arrays (MEAs) recordings. NB = network burst.

(C) Representative raster plots showing 1 min of spontaneous activity from hiPSC-derived neuronal networks (Ctrl1) before and after 1  $\mu$ M TTX treatment, including before addition of TTX (Pre-drug-0 h), 48 h after addition of TTX (TTX treatment-48 h), 1 h after TTX withdrawal (TTX withdrawal-1 h), and 48 h after TTX withdrawal (TTX withdrawal-48 h).

(D) Principal-component analysis (PCA) plot displaying PC1 and PC2 of all nine analyzed MEA parameters for vehicle-treated (Veh) and 48-h TTX-treated (TTX) neurons (Ctrl1 and Ctrl2). All MEA parameters were measured 1 h after TTX withdrawal. MFR = mean firing rate, PRS = percentage of random spike, BR = mean burst rate, BD = mean burst duration, BSR = burst spike rate, IBI = inter-burst interval, NBR = network burst rate, NBD = network burst duration, NIBI = Network burst IBI. n = number of MEA wells/batches: Veh n = 23/5, TTX n = 31/5 (Veh: n = 15/3 from Ctrl1, n = 8/2 from Ctrl2; TTX: n = 21/3 from Ctrl1, n = 10/2 from Ctrl2).

(E) Heatmap showing fold changes of all nine analyzed MEA parameters after TTX treatment (Ctrl1 and Ctrl2). All MEA parameters were measured at 1 h after TTX withdrawal. n = number of MEA wells/batches: Veh n = 23/5, TTX n = 31/5 (Veh: n = 15/3 from Ctrl1, n = 8/2 from Ctrl2; TTX: n = 21/3 from Ctrl1, n = 10/2 from Ctrl2).

(legend continued on next page)

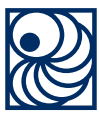

2016). They are increasingly used as a model system to understand the pathophysiology of brain disorders, primarily by studying spontaneous activity under basal conditions (McCready et al., 2022; van Hugte and Nadif Kasri, 2019). However, despite the overwhelming implication of synaptic and homeostatic plasticity deficits in brain disorders, only a handful of studies have investigated mechanisms of plasticity in hiPSC-derived neurons (Cordella et al., 2022; Pre et al., 2022; Meijer et al., 2019; Zhang et al., 2018). In particular, no attention has been given to the study of homeostatic plasticity at the network level in hiPSC-derived neurons.

Here, we established a model of tetrodotoxin (TTX)-induced homeostatic plasticity in co-cultures of hiPSC-derived glutamatergic neurons on microelectrode arrays (MEAs), which we have previously shown to facilitate non-invasive, reproducible, real-time, and multidimensional measurement of activity in hiPSC-derived neuronal networks (Mossink et al., 2021). We characterized single-cell and network changes induced with this form of homeostatic plasticity, together with changes in gene expression that may underlie them. We show that hiPSC-derived neuronal networks form a reliable platform to measure and characterize homeostatic plasticity, which can also be harnessed to investigate homeostatic plasticity in human models for brain disorders at the network and single-cell level.

## RESULTS

### TTX-induced homeostatic plasticity leads to re-arrangement of neuronal networks

Populations of hiPSC-derived neurons cultured on MEAs generate highly synchronous network bursting activity within a few days *in vitro* (DIV) (Frega et al., 2019; Frega et al., 2017). During the initial 2 weeks of differentiation, the activity of the control glutamatergic neuronal network primarily consisted of random spikes (isolated asynchronous spikes) and bursts (high frequency action potentials). As differentiation progressed, these bursts organized into network bursts (rhythmic, synchronous events). Throughout maturation, the networks displayed an increase in mean firing rate (MFR) and (network) burst rate (NBR/BR), and a decrease in (network) burst duration (NBD/BD), and percentage of random spikes (PRS). Starting from DIV 27, these parameters

reached a plateau, indicating stabilization of neuronal network activity.

To investigate the effect of chronic activity perturbation on neuronal network dynamics, we co-cultured glutamatergic neurons, derived from three independent control hiPSC lines (Ctrl1, 2, and 3), with rat astrocytes on MEAs and treated them with TTX, a sodium channel blocker, or with a control vehicle (Figure 1A). This procedure allows for testing if neuronal networks adapt to changes in neuronal activity by means of homeostatic plasticity. At both DIV 30 and DIV 49, the presence of rhythmic and synchronous network bursts, integrated by many spikes and involving most of the channels (Figures 1B, 1C, S1A, S1B, and S1E), indicated that control hiPSC-derived glutamatergic neurons had organized into synaptically connected and spontaneously active neuronal networks (Frega et al., 2017).

TTX treatment for 48 h on DIV 49 networks completely abolished neuronal activity (Figure 1C). Removing TTX after the 48-h treatment led to a significant increase in network bursting activity, compared with pre-drug and vehicle-treated control conditions (Figure 1C, S1B, S1E, and S1F). To obtain a full picture of the network changes, we performed a principal-component analysis (PCA), including nine independent MEA parameters (Mossink et al., 2021). PCA indicated a clear separation between TTX- and vehicle-treated neuronal networks (Figure 1D). The analysis identified mean NBR, BR, BD, and burst spike rate (BSR) as the primary parameters responsible for the observed changes between the two treatment groups (Figure 1D). NBR and BR were increased, while BD, BSR, NBD, and network inter-burst interval (NIBI) were decreased following TTX exposure compared with the vehicle-treated condition. In contrast, we found no change in MFR, PRS, and inter-burst interval (IBI) after TTX exposure (Figure 1E). Moreover, upon TTX treatment, the cross correlation within the entire neuronal network was increased. Specifically, neuronal networks subjected to TTX treatment showed increased link weight, while the number of links remained unchanged (Figure S1I). Together, these results suggest that the induction of homeostatic plasticity by prolonged TTX exposure leads to re-arrangement of neuronal networks, without an increase in network activity (as measured by MFR).

Previous studies in rodents have shown that homeostatic plasticity response to TTX at the single-cell level is

(F) Bar graphs showing the effect of 12 h, 24 h, 36 h, and 48 h TTX treatment on the NBR, BR, and BD for Ctrl1 neuronal networks. All MEA parameters were measured 1 h after TTX withdrawal. n = number of MEA wells/batches: Veh n = 6/2 for each group, TTX n = 6/2 for each group.

(G) Quantification of NBR and BR over time for vehicle-treated (Veh) and 48-h TTX-treated (TTX) neurons (Ctrl1). n = number of MEA wells/batches: Veh n = 15/3, TTX n = 21/3. Data represent means  $\pm$  SEM. ns: not significant, \*p < 0.05, \*\*p < 0.005, \*\*\*p < 0.0005, \*\*\*\*p < 0.0001. For (E), unpaired Student's t test was performed between two groups. For (F) and (G), two-way ANOVA test followed by a post hoc Bonferroni correction was performed between conditions. All means, SEMs, and test statistics are listed in Table S3.

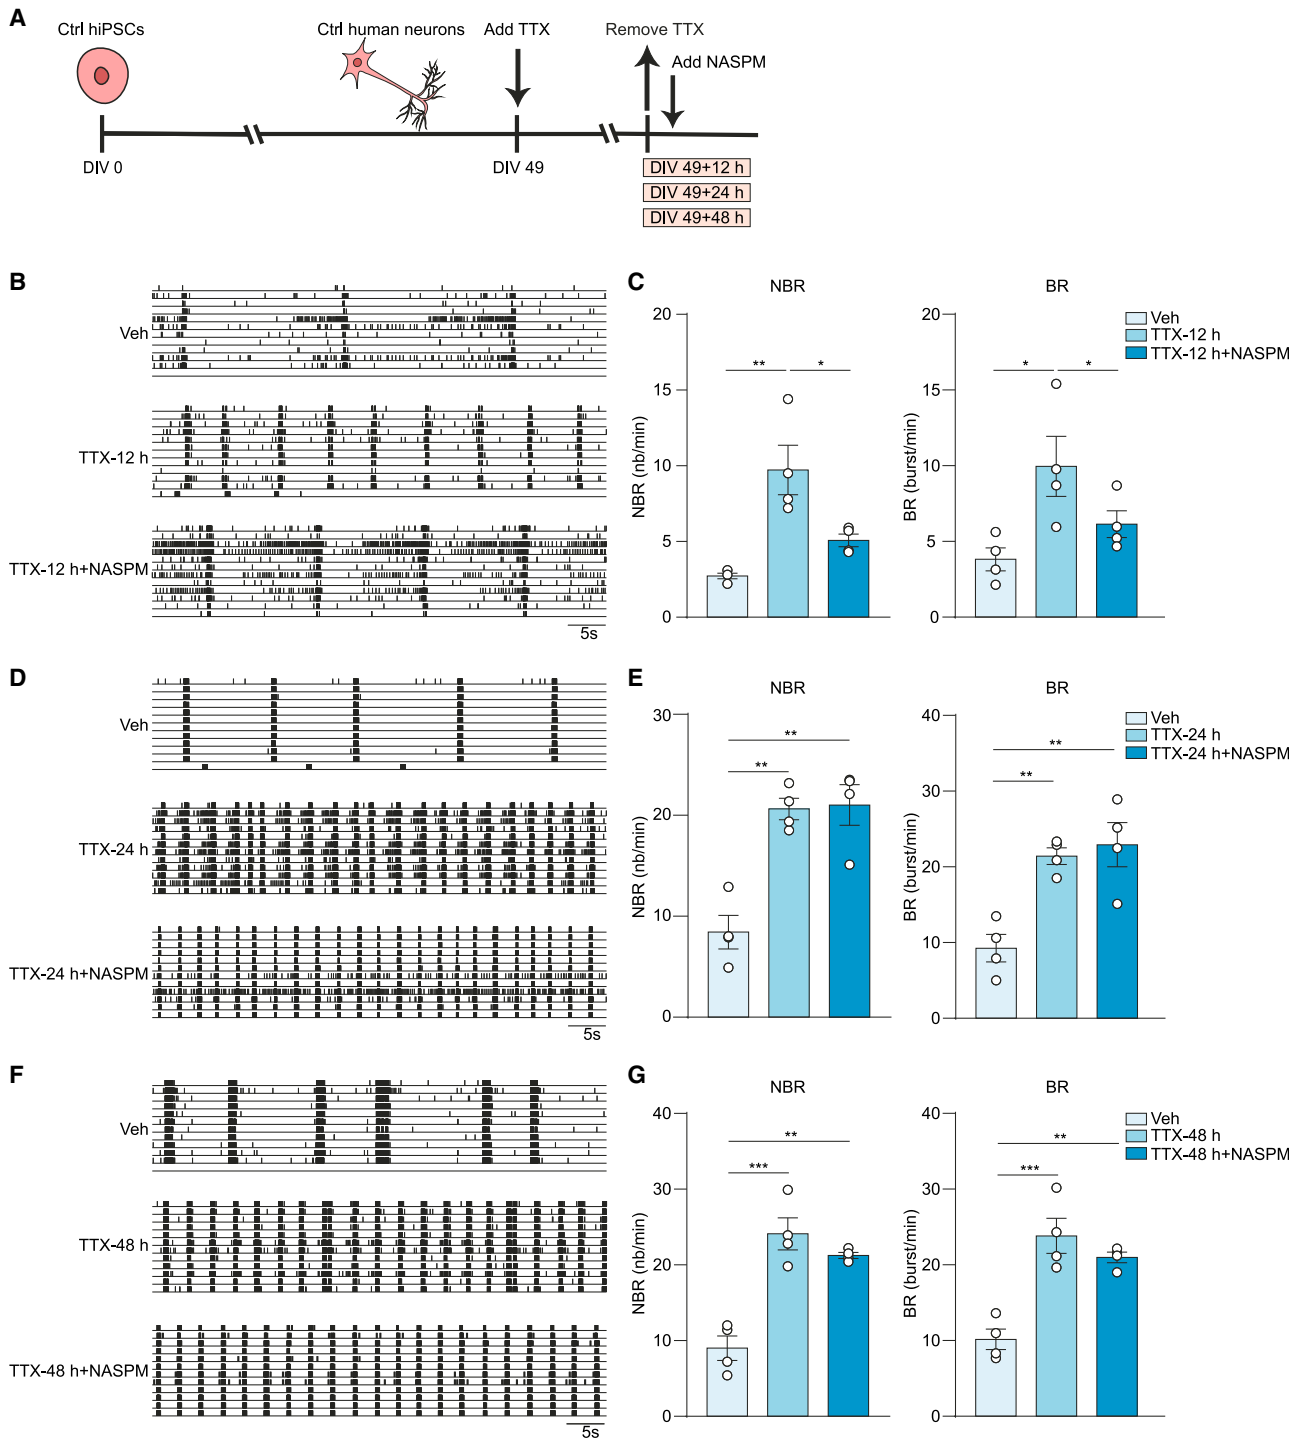

**Figure 2. GluA2-lacking AMPA receptors are expressed in an early stage of homeostatic plasticity**

(A) Schematic representation of tetrodotoxin (TTX) treatment and 1-naphthyl acetyl spermine trihydrochloride (NASPM) treatment workflow.

(B) Representative raster plots showing 1 min of spontaneous activity from Ctrl2 neuronal networks grown on microelectrode arrays (MEAs). Where indicated, the neurons were vehicle-treated (Veh), or neurons were first treated with 1  $\mu$ M TTX for 12 h and then TTX was removed (TTX-12 h), or neurons were treated with 10  $\mu$ M NASPM after TTX was removed (TTX-12 h+NASPM).

*(legend continued on next page)*



dependent on the duration of TTX treatment (Benevento et al., 2016; Iyata et al., 2008). We tested if this was also the case at the network level in human neuronal networks by applying TTX for 12, 24, 36, and 48 h. Following the withdrawal of TTX, we observed a significant increase in both NBR and BR already after only 12 h of treatment. These parameters continued to increase with longer treatment durations, peaking at 36 to 48 h of TTX treatment before reaching a plateau. However, BD only decreased after 48 h of TTX exposure, and not with shorter TTX exposures (Figures 1F and S1C). Of interest, when we recorded the network activity on an hourly basis to investigate if the changes in network activity persisted after TTX withdrawal, we found that 48-h TTX-treated neuronal networks gradually returned to pre-drug levels within 48 h (Figures 1G and S1D). This confirms the continuous nature of homeostatic plasticity in human neuronal networks.

### GluA2-lacking AMPA receptors are expressed in an early stage of homeostatic plasticity in hiPSC-derived neurons

Membrane insertion of GluA2-lacking AMPA receptors (calcium-permeable AMPA receptors) is required for the induction of homeostatic plasticity. GluA2-lacking AMPA receptors are subsequently replaced with GluA2-containing AMPA receptors (Sutton et al., 2006; Hou et al., 2008). These mechanisms regulate synaptic strength and are known to underlie synaptic scaling mechanisms (Man, 2011; Soares et al., 2013). To investigate if these mechanisms are also contributing to homeostatic plasticity in this human model system, we first tested if activity in control hiPSC-derived neuronal networks is driven by AMPA receptors, by adding a selective antagonist of AMPA receptors (NBQX). NBQX completely abolished the network bursting activity compared with vehicle-treated conditions (Figures S2C and S2D) (Frega et al., 2019). Next, we applied 1-naphthyl acetyl spermine trihydrochloride (NASPM), a specific antagonist for GluA2-lacking AMPA receptors, to hiPSC-derived neuronal networks that were already

exposed to TTX for 12, 24, and 48 h (Figure 2A). We found that NASPM prevented the TTX-induced increase in NBR and BR (Figures 2B and 2C) in the neuronal networks treated for 12 h with TTX. Importantly, NASPM had no effect on NBR and BR before TTX application (Figures S2A and S2B), confirming that the expression of GluA2-lacking AMPA receptors was exclusively induced by neuronal activity suppression with TTX. After longer TTX exposure, i.e., 24 h and 48 h, NASPM did not affect the increase in NBR and BR (Figures 2D–2G), suggesting that GluA2-lacking AMPA receptors had already been replaced by GluA2-containing AMPA receptors at these time points. Taken together, these results indicate that GluA2-lacking AMPA receptors do contribute to network re-arrangement in hiPSC-derived neuronal networks, where they are incorporated into synapses in an early stage of TTX-induced homeostatic plasticity (0–12 h).

### Homeostatic plasticity involves increased miniature excitatory postsynaptic current amplitude and elongation of axon initial segments in hiPSC-derived neurons

We next investigated presynaptic and postsynaptic contributions to synaptic scaling following TTX treatment at the single-cell level. With whole-cell electrophysiological recordings of hiPSC-derived neurons treated with vehicle or TTX for 48 h, we found that TTX treatment induced an increase in miniature excitatory postsynaptic current (mEPSC) amplitude without affecting mEPSC frequency (Figures 3A–3C and S3A–S3C). The changes in mEPSC amplitude were scalable, as they were observed across different mEPSC amplitudes (Figures 3D and S3D), which is a major property of synaptic scaling (Moulin et al., 2020; Turrigiano et al., 1998). This functional readout suggests that neuronal activity suppression results in increased postsynaptic AMPA receptor expression. To corroborate these results, we quantified the surface expression of AMPA receptors GluA1 and GluA2 at the postsynaptic membrane after TTX treatment. Analysis of GluA2 surface

(C) Bar graphs showing the quantification of mean network burst rate (NBR) and mean burst rate (BR) for (B).  $n$  = number of MEA wells/batches: Veh  $n$  = 4/1, TTX-12 h  $n$  = 4/1, TTX-12 h+NASPM  $n$  = 4/1.

(D) Representative raster plots showing 1 min of spontaneous activity from Ctrl1 neuronal networks grown on MEAs. Where indicated, the neurons were vehicle-treated (Veh), or neurons were first treated with 1  $\mu$ M TTX for 24 h and then TTX was removed (TTX-24 h), or neurons were treated with 10  $\mu$ M NASPM after TTX was removed (TTX-24 h+NASPM).

(E) Bar graphs showing the quantification of NBR and BR for (D).  $n$  = number of MEA wells/batches: Veh  $n$  = 4/1, TTX-24 h  $n$  = 4/1, TTX-24 h+NASPM  $n$  = 4/1.

(F) Representative raster plots showing 1 min of spontaneous activity from Ctrl1 neuronal networks grown on MEAs. Where indicated, the neurons were vehicle-treated (Veh), or neurons were first treated with 1  $\mu$ M TTX for 48 h and then TTX was removed (TTX-48 h), or neurons were treated with 10  $\mu$ M NASPM after TTX was removed (TTX-48 h+NASPM).

(G) Bar graphs showing the quantification of NBR and BR for (F).  $n$  = number of MEA wells/batches: Veh  $n$  = 4/1, TTX-48 h  $n$  = 4/1, TTX-48 h+NASPM  $n$  = 4/1. Data represent means  $\pm$  SEM. \* $p$  < 0.05, \*\* $p$  < 0.005, \*\*\* $p$  < 0.0005, one-way ANOVA test followed by a post hoc Bonferroni correction was performed between conditions. All means, SEMs, and test statistics are listed in Table S3.



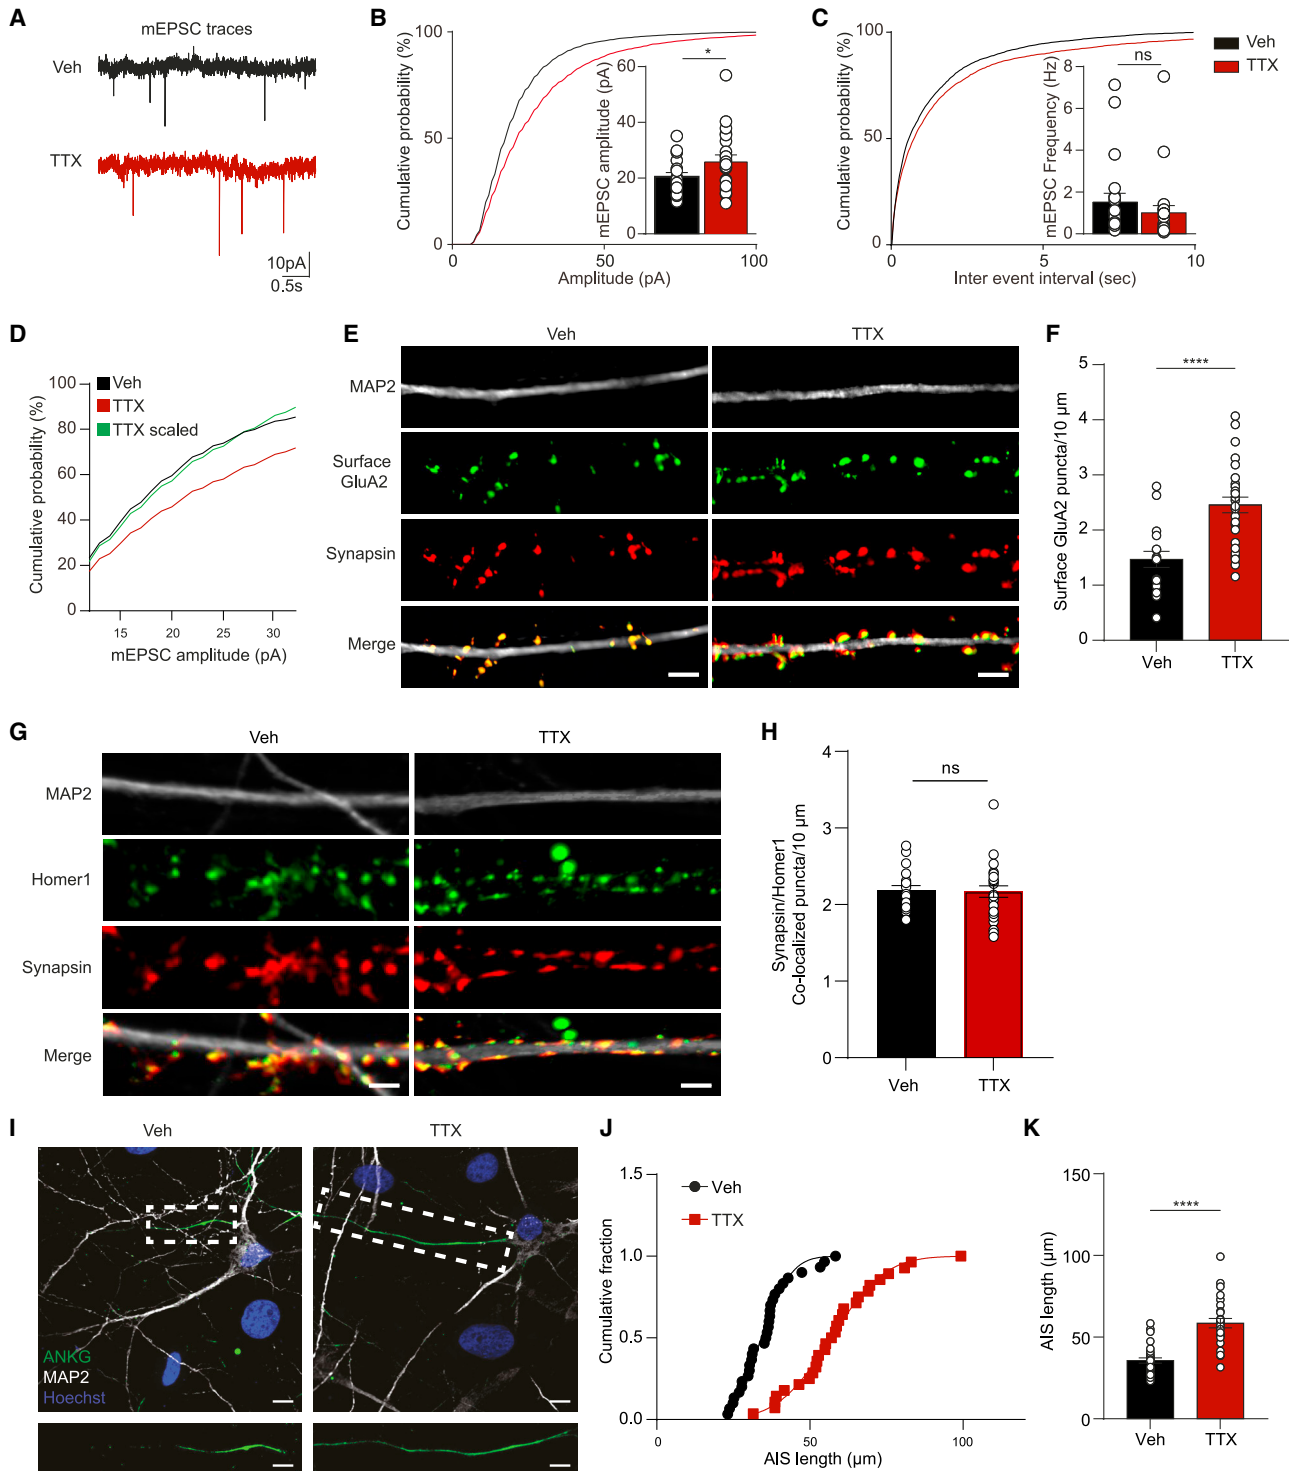

**Figure 3. Increased miniature excitatory postsynaptic current (mEPSC) amplitudes and elongation of axon initial segment (AIS) following TTX treatment**

(A–D) Representative mEPSC traces of vehicle-treated (Veh) and 48-h TTX-treated (TTX) neurons (Ctrl1; A). Quantification of the amplitude (B) and frequency of mEPSCs (C) in Veh- and TTX-treated neurons. n = number of cells/batches: Veh n = 21/3, TTX n = 23/3. Rescaled cumulative mEPSCs amplitude (Scaling = TTX values \* 1.21; D).

(legend continued on next page)



expression indeed revealed an increase in the number of surface GluA2 puncta after 48 h of TTX treatment (Figures 3E and 3F), which is in line with our functional data at single-cell and neuronal network levels. However, TTX did not cause changes in the number of surface GluA1 puncta (Figures S3H and S3I). In addition, we found no difference in the density of Synapsin/Homer1 co-localized puncta between vehicle- and TTX-treated neurons (Figures 3G and 3H), suggesting that the TTX treatment did not induce any alteration in the number of functional synapses. However, an increased density of Homer1 puncta was noticed following TTX treatment, while no changes were observed in the intensity of Homer1 or the density of Synapsin (Figures S3E–S3G).

In addition to synaptic scaling, neurons also respond to altered activity by modifying their intrinsic excitability. Changes in neuronal intrinsic excitability can occur through a variety of mechanisms, including changes in structural characteristics of the axon initial segment (AIS). For instance, the elongation of the AIS has been shown to increase neuronal excitability and to facilitate action potential generation (Kuba et al., 2010, 2015). TTX treatment (48 h) significantly increased AIS length compared with vehicle-treated neurons (Figures 3I–3K). This confirms that, besides changes in functional synaptic properties, alterations in the structural characteristics of axons also occur following neuronal activity suppression with TTX and may contribute to the increase in network excitability.

### Transcriptional changes in neurons following TTX treatment are associated with homeostatic plasticity

The increase in AMPA receptor levels can be seen as early as 4–6 h after activity suppression. The increase in synaptic strength continues for up to 24 or 48 h (Ibata et al., 2008). This time frame of homeostatic plasticity-related processes suggests that changes in the transcription program of neurons could mediate such processes (Ibata et al., 2008; Schaukowitz et al., 2017). In order to further understand the molecular changes associated with a later stage of TTX-induced homeostatic plasticity, in both neurons and astrocytes, we performed RNA-sequencing

(RNA-seq) of vehicle- and 48-h TTX-treated DIV 49 neuron-astrocyte co-cultures. hiPSCs-neuronal networks highly expressed *SLC17A6*, as well as genes coding for AMPA (e.g., *GRIA2*), Kainate (e.g., *GRIK5*), and NMDA (e.g., *GRIN3A* and *GRIN2D*; Figure S4E) receptor subunits, confirming the glutamatergic identity of our cultures. PCA analysis segregated TTX- and vehicle-treated neurons and astrocytes, confirming TTX treatment-related changes in the transcriptional activity of the neuronal networks (Figures 4A and 5A).

With an absolute  $\log_2$  fold change (FC) >0.58 and multiple testing-adjusted p value <0.05, we identified 366 down-regulated and 264 up-regulated genes in TTX-treated neuronal networks, compared with vehicle-treated ones (Figure 4B and Table S1). These transcriptional changes were consistent across samples within each condition (Figure 4C). The largest changes in gene expression were observed for *IQ-GAP3*, *ANGPTL2*, *AQP3*, *ENSG00000286502*, and *HK2* (Figure 4B and Table S1).

Among genes up-regulated by TTX treatment, gene ontology (GO) analysis showed “extracellular matrix organization” to be the most strongly enriched term, including members of the Disintegrin and Metalloproteinase with Thrombospondin motifs (ADAMTS) family, such as *ADAMTS17*, *ADAMTS8*, and *ADAMTS18* (Figures 4D and S4A, and Table S1). Additionally, the term “positive regulation of gene expression” was also enriched, including several transcription factors, such as *ATF3* and *HOXA5* (Figure S4A and Table S1).

Genes down-regulated by TTX treatment, including *ADAMTSL4*, *ADAMTS9*, *NPTX1*, *BDNF*, *VGF*, *NR4A1*, and *TNC* (Figure S4A and Table S1), were generally related to cell communication; enriched terms included “response to stimulus”, “signaling”, “transport”, “vesicle”, “extracellular space”, and “cell junction” (Figure 4D and Table S1). Neuronal pentraxin-1 (NPTX1) and brain-derived neurotrophic factor (BDNF) have been previously implicated in homeostatic plasticity. While chronic network deprivation leads to decreased BDNF release (Karpova et al., 2010; Castren et al., 1992), increased *Nptx1* expression was observed 6 h after TTX treatment in mouse hippocampal cultures

(E) Representative images of vehicle-treated (Veh) and 48 h TTX-treated (TTX) neurons (Ctrl1) stained for MAP2 (gray), surface GluA2 (green), and Synapsin 1/2 (red) (scale bar, 5  $\mu$ m).

(F) Quantification of GluA2 puncta (number per 10  $\mu$ m). n = number of cells/batches: Veh n = 18/2, TTX n = 28/2.

(G) Representative images of vehicle-treated (Veh) and 48-h TTX-treated (TTX) neurons (Ctrl1) stained for MAP2 (gray), Homer1 (green), and Synapsin 1/2 (red) (scale bar, 5  $\mu$ m).

(H) Quantification of Synapsin/Homer1 co-localized puncta (number per 10  $\mu$ m). n = number of cells/batches: Veh n = 20/1, TTX n = 25/1.

(I) Representative images of vehicle-treated (Veh) and 48 h TTX-treated (TTX) neurons (Ctrl1) stained for MAP2 (gray), ANKG (green), and Hoechst (blue) at DIV 49 (scale bar, 5  $\mu$ m).

(J and K) Plots showing cumulative fraction and quantification of the length axon initial segment (AIS;  $\mu$ m). n = number of cells/batches: Veh n = 14/2, TTX n = 14/2. Data represent means  $\pm$  SEM. ns: not significant, \*p < 0.05, \*\*\*\*p < 0.0001, unpaired Student's t test was performed between two groups. All means, SEMs, and test statistics are listed in Table S3.

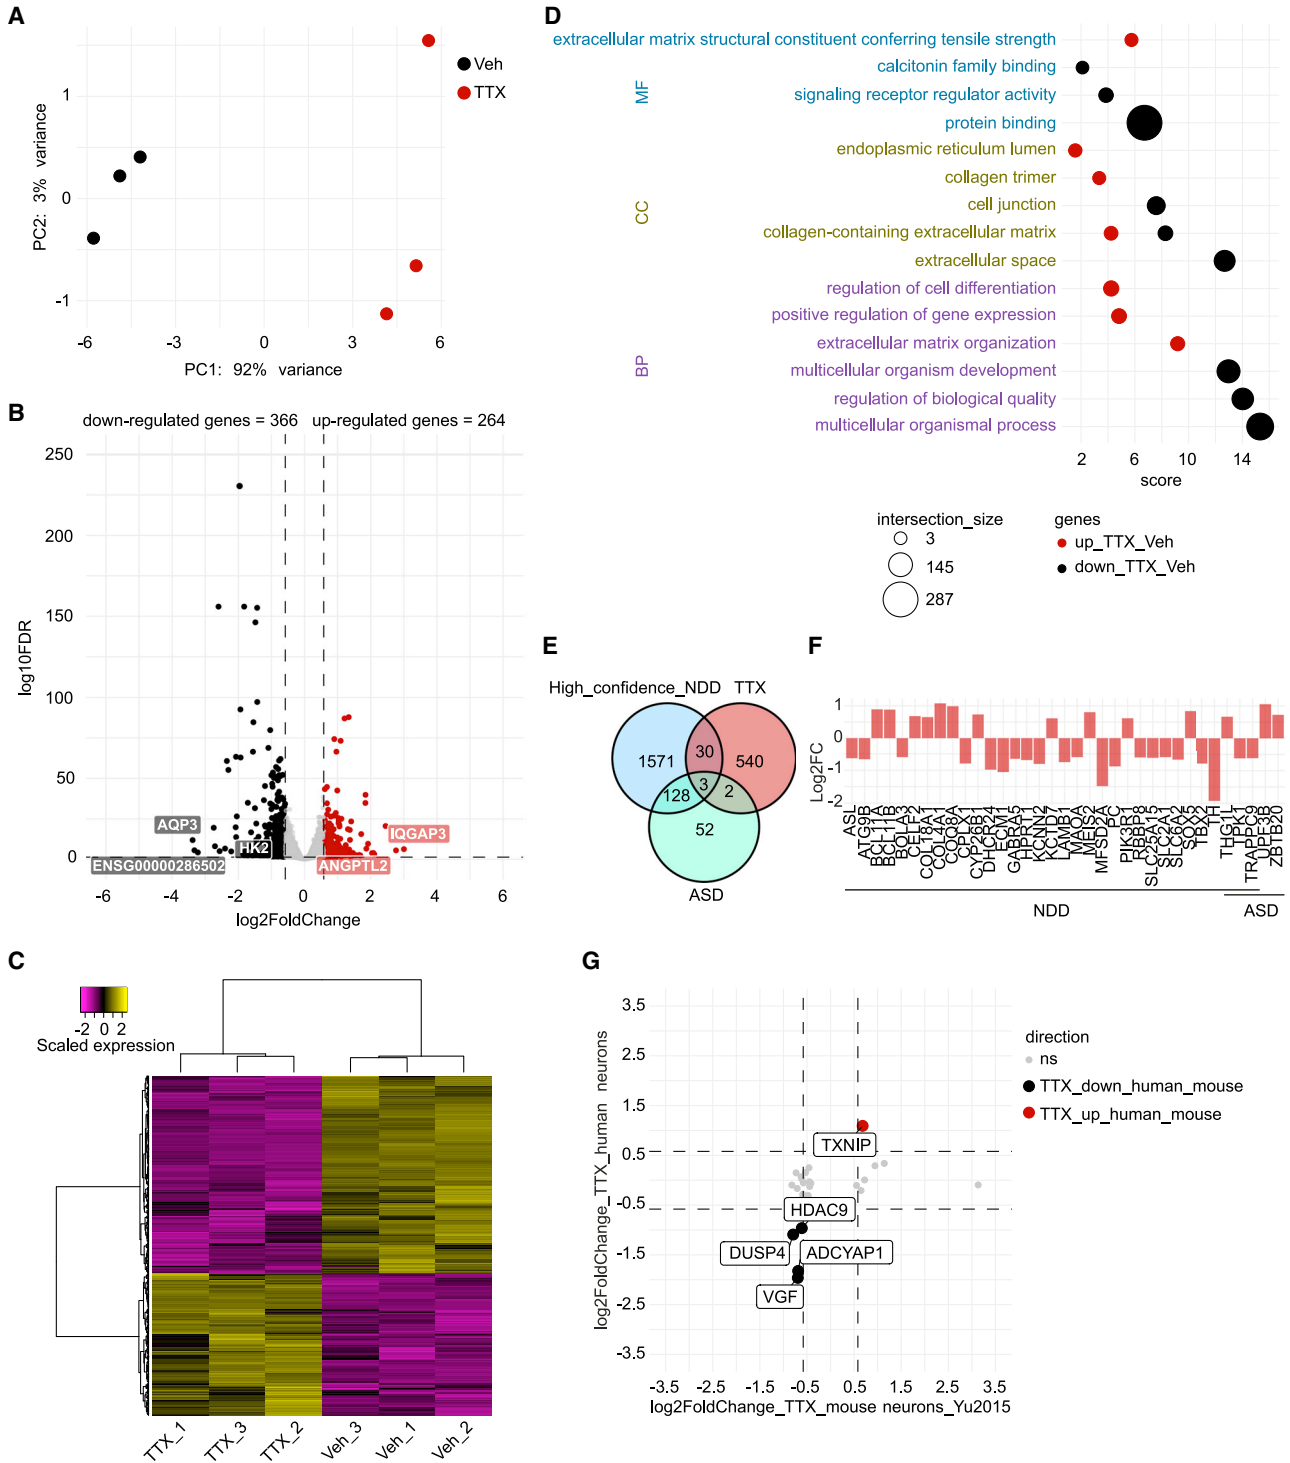

**Figure 4. Transcriptional changes in human neurons associated with homeostatic plasticity**

(A) Principal-component analysis (PCA) of RNA-sequencing data of six samples, three TTX- and three vehicle-treated hiPSC-derived neurons samples (Ctrl1). Colors indicate the received treatment (red = TTX, and black = vehicle).

(B) Volcano plot depicting differential gene expression between TTX- and vehicle-treated neurons. Colored dots indicate differentially expressed genes (DEGs; absolute log<sub>2</sub> fold change (Log<sub>2</sub>FC) > 0.58 and adjusted p value < 0.05). Up-regulated genes in TTX-treated neurons

(legend continued on next page)



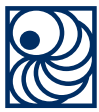

(Schaukowitch et al., 2017). We observed reduced *BDNF* and *NPTX1* expression in the TTX-treated networks, which was corroborated with quantitative polymerase chain reaction (Figure S4B). The dissimilarity in *NPTX1* expression level between our study and the previous finding (Schaukowitch et al., 2017) might be attributed to different stages of homeostatic plasticity being examined. Our RNA-seq analysis focused on a later stage (48 h) of homeostatic plasticity, during which we exclusively observed a decrease in *NPTX1* expression, potentially leading to an enhancement in intrinsic excitability (Figueiro-Silva et al., 2015). We did not observe changes in the expression of genes coding for AMPA or NMDA receptors following TTX treatment (Figure S4E), indicating that the observed alterations in AMPA receptors occur exclusively at the postsynaptic membrane surface and not at the transcriptional level. By assessing the function of TTX-induced differentially expressed genes (DEGs) in the synaptic compartment through SynGO ontologies and annotations (Koopmans et al., 2019), we observed that DEGs were mostly associated with synaptic organization, synaptic signaling, and presynaptic and postsynaptic processes (Figures S4C and S4D, and Table S1).

Considering that alterations in homeostatic plasticity during development may contribute to the pathophysiology of different NDDs (Antoine et al., 2019; Bulow et al., 2019; Lee et al., 2018; Benevento et al., 2016; Zeng et al., 2007; Dani et al., 2005), we tested whether the TTX-induced transcriptional changes were associated with genes previously related to NDDs (Fu et al., 2022; Leblond et al., 2021). While we did not identify a significant association between the list of TTX-induced DEGs and lists of genes previously related to NDDs (Table S1), we still observed some overlap (5.6%; 35 of 630; Figures 4E and 4F), including *MAOA*, *TH*, and *TRAPPC9* (Figure 4F and Table S1). This result suggests that altered expression

of these genes could affect homeostatic plasticity in some NDDs.

Finally, to identify potential conserved molecular mechanisms involved in homeostatic plasticity between human and mouse neurons, we compared our list of TTX-induced DEGs with previously identified TTX-induced DEGs in mouse primary hippocampal neurons (Yu et al., 2015). The overlap with previously identified up-regulated (0.4%; 1 of 264) and down-regulated DEGs was, however, low (1%; 4 of 366; Figure 4G and Table S1). Overlapping genes were *TXNIP*, *HDAC9*, *DUSP4*, *ADCYAP1*, and *VGF* (Figure 4G and Table S1). This may suggest that changes in gene expression activity contributing to homeostatic plasticity differ between mice and humans. However, differences in the experimental design, including different studied brain regions (mouse primary hippocampal neurons versus co-cultures of human cortical neurons and rat astrocytes), or different stages of homeostatic plasticity (4-h TTX treatment versus 48-h TTX treatment) could also be contributing to the lack of consistency between the species.

Overall, these results identify multiple genes that likely contribute to homeostatic plasticity. Suppression of neuronal activity may induce reduction in the expression of genes involved in cell communication, while changes in the extracellular matrix might contribute to increased neuronal synchronized activity observed in homeostatic plasticity.

### Suppression of neuronal activity induces transcriptional changes in astrocytes

Astrocytes are sensitive to changes in neuronal activity and are known regulators of homeostatic plasticity (Lines et al., 2020; Perez-Catalan et al., 2021). We identified 91 up-regulated and 87 down-regulated astrocytic genes in response to neuronal activity suppression with TTX (Figure 5B and

---

are shown in red, down-regulated genes are depicted in black. The five genes with the greatest change in expression activity between the two conditions are indicated.

(C) Heatmap depicting scaled expression of DEGs in the six samples.

(D) Scatterplot of the enrichment analysis results depicting the top three significant gene ontology (GO) terms associated with up-regulated (red dots) and down-regulated genes (black dots) in neurons exposed to TTX treatment as compared with vehicle-treated neurons. Terms are ordered per ontological category (MF: molecular function; CC: cellular component; BP: biological process). The size of the dots indicates the number of genes observed in the list of DEGs and the list of genes associated with the particular term. Score: negative  $\log_{10}$  of the adjusted p value resulting from the enrichment analysis.

(E) Venn diagram depicting the number of shared genes between the list of DEGs in TTX-treated neurons (red circle, TTX) and genes previously related to neurodevelopmental disorders (NDDs; light-blue circle, High\_confidence\_NDD) (Leblond et al., 2021) and highly confident autism-related genes (light-green circle, ASD) (Fu et al., 2022).

(F) Bar plot depicting the  $\text{Log}_2\text{FC}$  value of the 35 shared genes observed in (E). Fold change was calculated by normalizing gene expression level of TTX-treated condition to vehicle-treated condition.

(G) Four-way volcano plot depicting expression changes in hiPSC-derived neurons and mouse neurons treated with TTX (absolute  $\text{Log}_2\text{FC} > 0.58$  and adjusted p value  $< 0.05$ ) (Yu et al., 2015). Each dot represents a gene. Red dots represent genes up-regulated in both hiPSC-derived neurons and mouse neurons in response to TTX, black dots represent down-regulated genes in both hiPSC-derived neurons and mouse neurons exposed to TTX.

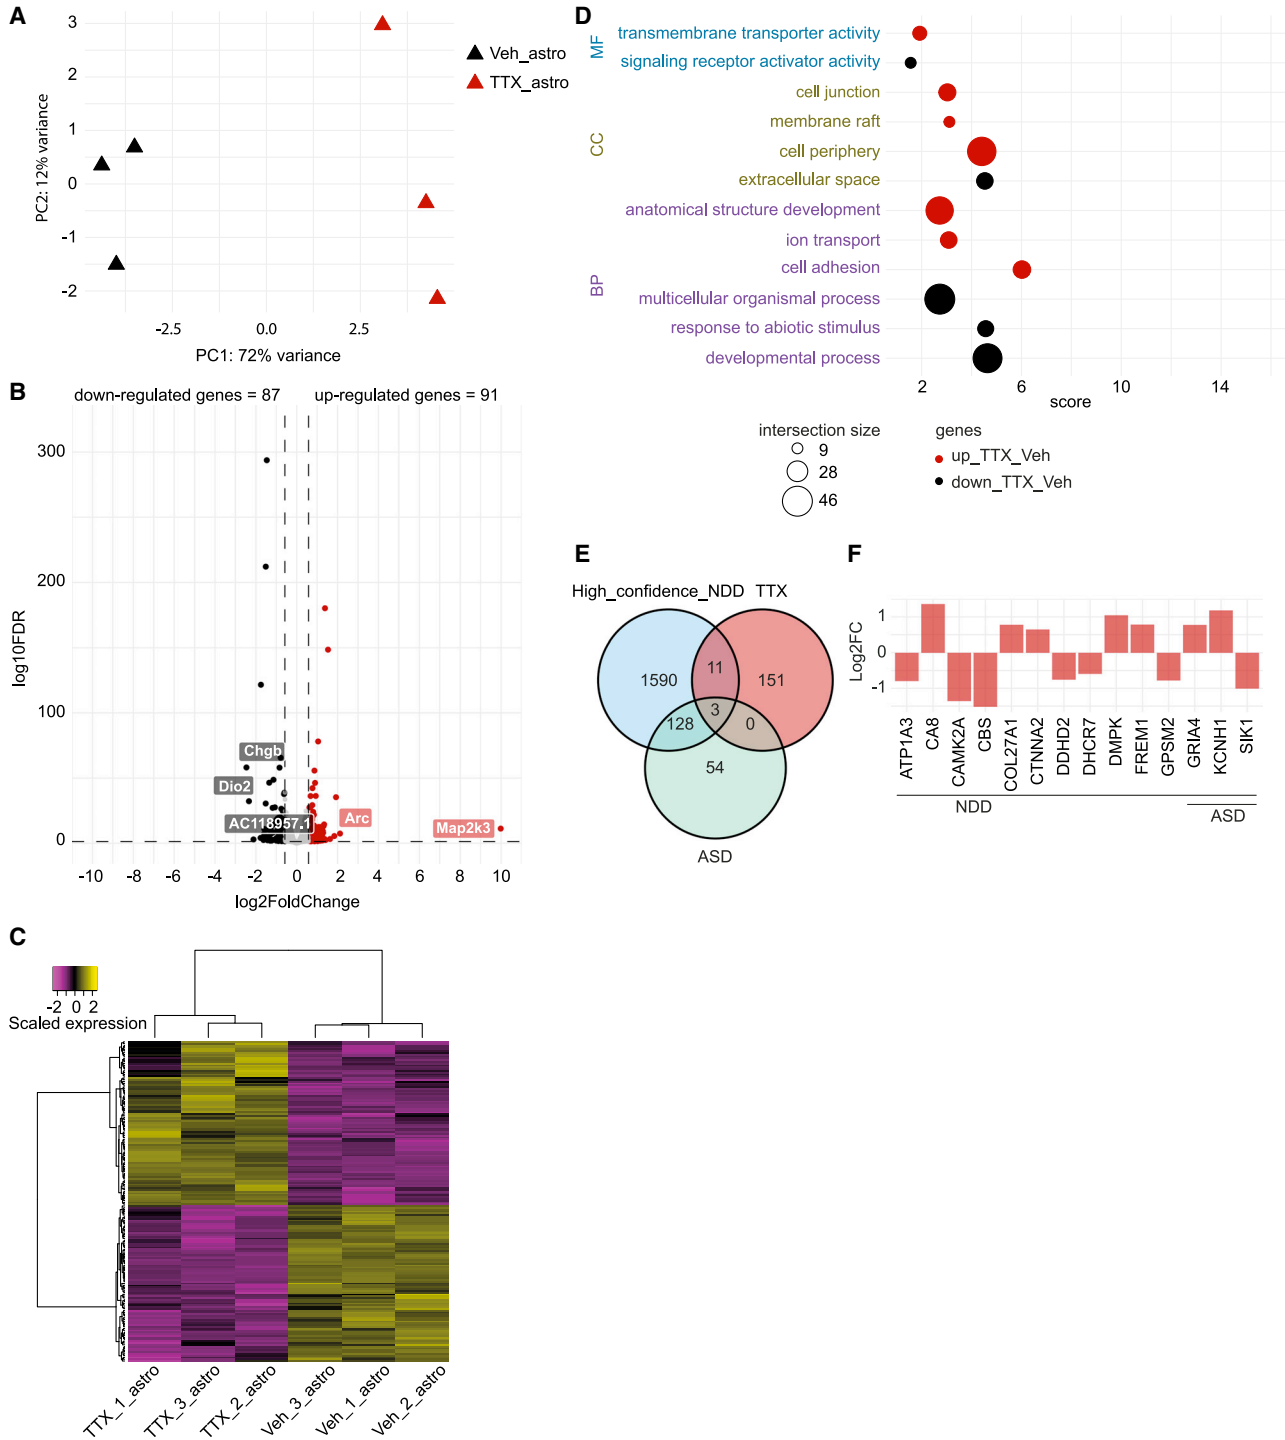

**Figure 5. Transcriptional changes are induced by suppression of neuronal activity in rat astrocytes**

(A) PCA plot of RNA-sequencing data of six samples, three TTX- and three vehicle-exposed rat astrocytes derived from co-cultures with hiPSC-derived neurons (Ctrl1). Colors indicate the received treatment (red = TTX, and black = vehicle).

(B) Volcano plot depicting differential gene expression between TTX- and vehicle-exposed astrocytes. Colored dots indicate DEGs (Absolute Log<sub>2</sub>FC > 0.58 and adjusted p value < 0.05). Up-regulated genes in TTX-exposed astrocytes are shown in red, down-regulated genes are depicted in black. The five genes with the greatest change in expression activity between the two conditions are indicated.

(C) Heatmap depicting the scaled expression of DEGs in the six astrocyte samples.

(legend continued on next page)



Table S2). Transcriptional changes in astrocytes were consistently seen in the same conditions (Figure 5C and Table S2). *Arc*, *Map2k3*, *Dio2*, *Chgb*, and *AC118957.1* were identified as the genes with the strongest expression changes between vehicle- and TTX-exposed astrocytes (Figure 5B and Table S2).

GO enrichment analysis indicated significant association between the up-regulated astrocytic genes and ontological terms likely related to neuronal function (Figure 5D and Table S2), such as “cell junction”, “ion transport”, “neuron projection”, and “transmembrane transporter activity”. Particularly, the expression of *Arc*, *Egr3*, *Avpr1a*, and *Astn2* was increased in TTX-exposed astrocytes (Figure S5A and Table S2). Together, these observations suggest that upon suppression of neuronal activity, astrocytes increase the expression of genes that could modulate synaptic activity. In contrast, down-regulated genes in astrocytes exposed to TTX showed significant association with terms related to “response to abiotic stimulus”, “response to external stimulus”, and “signaling receptor activity”, suggesting that a reduced expression of genes related to response to stimuli in astrocytes may be a consequence of neuronal activity suppression, which could decrease the stimulation of the astrocytes in culture. We further assessed the role of astrocytic DEGs induced by neuronal activity suppression in the synaptic compartment using SynGO ontologies and annotations (Koopmans et al., 2019); we observed that astrocytic DEGs were related to both presynaptic and postsynaptic processes (Figures S5C and S5D, and Table S2).

Similar to our analysis for the hiPSC-derived neurons, we compared the list of DEGs in astrocytes exposed to neuronal activity suppression with lists of genes previously related to NDDs (Fu et al., 2022; Leblond et al., 2021). We found that 7.9% (14 of 178) of DEGs were known NDD genes (Figure 5E and Table S2), such as *Camk2a* (Figure 5F and Table S2). Their observed roles in NDDs might thus be related to an impaired astrocytic contribution to homeostatic plasticity.

Finally, to identify potentially shared mechanisms between neurons and astrocytes that could contribute to homeostatic plasticity in our co-cultures, we compared the transcriptional changes induced by TTX treatment in the

two cell types. To this end, we converted rat gene symbols to human gene symbols and combined the transcriptional profiles of all sequenced samples, including astrocytes and neurons. PCA showed cell type to be the major source of variation in gene expression. Nonetheless, samples were also segregated by treatment, suggesting some shared transcriptional changes in neurons and astrocytes after neuronal activity suppression (Figure S5B). When intersecting the list of DEGs by TTX treatment in neurons and astrocytes, we identified 11 commonly down-regulated genes, including *VEGFA*, *SCG2*, and *CCK*, while the expression of *ATF3* and *COL13A1* was increased in both cell types. We also identified nine genes with opposite changes in transcriptional activity between neurons and astrocytes, including *SPON1*, *IGFBP3*, and *DISP3* (Figure S5E). These oppositely regulated genes, of which several are involved in lipid and energy metabolism, may be involved in cross-talk mechanisms between neurons and astrocytes that contribute to homeostatic plasticity.

Concluding, our transcriptional analysis of astrocytes in the neuronal networks provides evidence corroborating their role in the regulation of homeostatic plasticity and identifies candidates for underlying genes and biological pathways.

## DISCUSSION

In this study, we describe a human *in vitro* neuronal model for studying homeostatic plasticity at the network level. Using this model, we provide insight into how synaptic strength and intrinsic properties of neurons cooperate to stabilize neuronal network activity in response to activity suppression. We demonstrated that chronic deprivation of neuronal activity through the inhibition of voltage-gated sodium channels with TTX elicited a time-dependent re-arrangement of neuronal networks. This re-arrangement was characterized by significant increase in the synchronized network activity following TTX treatment, as indicated by metrics such as mean NBR, mean BR, and cross correlation, while exhibiting no changes in global activity, as determined by MFR. TTX-induced modifications

(D) Scatterplot depicting the top three significant GO terms, per ontological category (molecular function: MF, cellular component: CC and biological process: BP), associated with up-regulated (red dots) and down-regulated genes (black dots) in astrocytes exposed to TTX treatment, as compared with vehicle-exposed astrocytes. The size of the dots indicates the number of intersected genes between the list of DEGs and the genes associated with the particular term. Score: negative logarithm<sub>10</sub> of the adjusted p value resulting from the enrichment analysis.

(E) Venn diagram depicting the number of shared genes between the list of DEGs in TTX-exposed astrocytes (red circle, TTX) and genes previously related to NDDs (light-blue circle, High\_confidence\_NDD) (Leblond et al., 2021) and highly confident autism-related genes (light-green circle, ASD) (Fu et al., 2022).

(F) Bar plot depicting the Log<sub>2</sub>FC value of the 14 shared genes observed in (E). Fold change was calculated by normalizing gene expression level of TTX-treated condition to vehicle-treated condition.



in neuronal network properties were accompanied by increased surface expression of postsynaptic AMPA receptors, as well as by elongation of axon initial segments. Additionally, we identified transcriptional changes induced by suppression of neuronal activity in neurons and astrocytes, which may underlie the network re-arrangement.

At the network level, we identified an increase in the mean NBR and mean BR, along with decreased mean BD, BSR, mean NBD, and NIBI following treatment with TTX. Previous studies have demonstrated that both AMPA and NMDA receptors play a crucial role in driving network bursting activity (Odawara et al., 2016; Suresh et al., 2016). However, our previous study demonstrated that in control hiPSC-derived neuronal networks, network bursting activity is mainly mediated by AMPA receptors (Frega et al., 2019). This was evidenced by the inhibition of AMPA receptors with NBQX completely abolished network bursting activity, whereas the blockade of NMDA receptors (D-AP5) only slightly reduced this form of activity, and mostly reduced NBD. In the present work, we observed increased expression of surface AMPA receptors following TTX treatment. An increase in AMPA receptors may facilitate excitatory neurotransmission (Watson et al., 2017; Niedringhaus et al., 2013), which could be translated into increased network bursts. Taken together, these findings suggest that changes in bursting activity, by means of increased NBR and BR, and reduced NIBI, can primarily be attributed to the up-regulation of surface AMPA receptors. Moreover, AMPA receptor-driven bursts have shorter durations, while NMDA receptor-driven bursts have comparatively longer durations (Odawara et al., 2016; Suresh et al., 2016). Therefore, the decrease in BD, NBD, and BSR may also be explained by increased expression of AMPA receptors after adding TTX. Further investigation is necessary to elucidate this relationship in greater detail.

Increased synchronized activity following neuronal activity suppression has been described in a rodent model of homeostatic plasticity, where short-term treatment with TTX induced synchronized burst oscillations (Zhou et al., 2009). Our study in hiPSC-derived neurons verified earlier reported presence of homeostatic plasticity mechanisms regulating neuronal excitability at the network and single-cell levels (Cordella et al., 2022; Zhang et al., 2018). We found that in the hiPSC-derived neurons, the early increase (0–12 h) in synchronized network activity observed after suppression of neuronal activity was dependent on the expression of GluA2-lacking AMPA receptors and, in a later stage (24–48 h), was associated with increased expression of GluA2-containing AMPA receptors. These findings align with previous studies in rodents showing involvement of GluA2-lacking AMPA receptors in the induction of homeostatic plasticity, particularly in

the early initiation phase (Hou et al., 2008; Sutton et al., 2006). Furthermore, a study of cultured rat hippocampal neurons demonstrated that just 1 h blockade of NMDA receptors leads to an up-regulation of GluA2-lacking AMPA receptors. However, it is important to note that GluA2-lacking receptors do not exert influence during the late phase of homeostatic plasticity, occurring 2 days after the suppression of firing rate through Kir2.1 transfection (Hou et al., 2008) and after 24–48 h of TTX in our *in vitro* human neurons. Moreover, we confirmed that the network re-arrangement following TTX treatment was associated with increased mEPSC amplitudes and elongation of the AIS, matching expected changes in structural properties of AIS and postsynaptic AMPA receptors after suppression of neuronal activity (Chater and Goda, 2014; Grubb and Burrone, 2010). Taken together, these results indicate that we provide a valid model of homeostatic plasticity.

Using our model system, we observed that increased synchronized activity gradually returned to pre-drug level within 48 h after TTX removal, consistent with the notion that homeostatic plasticity, as induced by TTX, will restore network activity from a hyper-active level to a set-point level. In mammalian synapses, pharmacological block of postsynaptic AMPA receptors or genetic knockout of GluA4 AMPA receptors is known to trigger a presynaptic form of homeostatic plasticity (Delvendahl et al., 2019; Jakawich et al., 2010; Lindskog et al., 2010). Thus in our model, we may hypothesize that the accumulation of postsynaptic AMPA receptors, as induced by the prolonged TTX exposure, might cause an increase in miniature excitatory postsynaptic potential amplitude, which then induces a homeostatic decrease in presynaptic vesicle release. Future studies are needed to test this hypothesis.

Previous studies in rodents suggested that transcriptional changes contribute to TTX-induced homeostatic plasticity (Valakh et al., 2023; Schaukowitz et al., 2017; Benevento et al., 2016; Yu et al., 2015). We noticed that both Valakh et al. and Schaukowitz et al. highlighted the modulation of transcriptional factor gene expression levels during TTX-induced homeostatic plasticity. Valakh et al. specifically emphasized that the activation of transcription factors from the PAR bZIP family (e.g., *Hlf* and *Tef*) plays a role in restraining the homeostatic up-regulation of network activity in response to activity suppression, particularly following a 5-day TTX treatment in mouse brain slice cultures. Similarly, Schaukowitz et al. demonstrated the up-regulation of two other transcription factors (*Elk1* and *Srf*) after a 6-h TTX treatment in primary mouse cortical cultures, and they could mediate TTX-dependent *Nptx1* induction. In our current study, we also observed an up-regulation of genes associated with “positive regulation of gene expression” in neurons following TTX treatment. Among these genes, certain transcription factors such as *ATF3* and *HOXA5* (Figure S4A)



have been previously demonstrated to regulate synaptic transmission and synaptic plasticity (Ahlgren et al., 2014; Lizen et al., 2017). Therefore, these transcription factors could potentially act as significant modulators of the homeostatic responses. In our previous study (Benevento et al., 2016) conducted on rat primary cortical neurons, we observed that genes exhibiting down-regulation following TTX treatment were associated with various biological processes, such as cholesterol biosynthesis and potassium ion channels. However, in our present study, we found that the down-regulated neuronal genes in response to TTX treatment were primarily related to cell communication. It is important to note that changes in gene expression related to cell communication may be a mere consequence of suppressing neuronal activity and might not directly connect to the underlying molecular mechanisms of homeostatic plasticity. For instance, the expression of *NR4A1* is activity-dependent (Jeanneteau et al., 2018; Hawk and Abel, 2011), and we observed reduced *NR4A1* in TTX-treated neurons. Feedback loops may be hypothesized, by which the detection of a reduced expression of genes related to cell communication could contribute to activating homeostatic plasticity mechanisms. In our comparative analysis between the DEGs resulting from TTX treatment (48 h), as observed in our study, and the ones reported by Yu et al., a subset of genes was found to be shared, including *TXNIP*, *HDAC9*, *DUSP4*, *ADCYAP1*, and *VGF*. Notably, Yu et al. focused on investigating the effects of TTX treatment on mouse primary hippocampal neurons at very early time points (4 h), indicating that these overlapping genes potentially hold significance in both stages of homeostatic plasticity. However, we have to highlight that our culture system lacks inhibitory input, which can have implications for modeling homeostatic plasticity in neuronal networks and may contribute to divergent observations across studies.

In addition, the transcriptional program induced by neuronal activity suppression implicated increased expression of neuronal genes related to “extracellular matrix organization.” Extracellular matrix (ECM) molecules are synthesized by neurons as well as by non-neural cells, and are secreted into the extracellular space (Dityatev and Schachner, 2003). Reorganization of the ECM can modulate neuronal connectivity and plays a role in synaptic plasticity and homeostasis (Bikbaev et al., 2015; Frischknecht and Gundelfinger, 2012; Dityatev et al., 2010). Members of the ADAMTS family, such as *ADAMTS17*, *ADAMTS8*, and *ADAMTS18*, exhibited increased expression in response to TTX (Figure S4A). These proteins are involved in the degradation of the ECM during development, and play an essential role in neuroplasticity (Ferrer-Ferrer and Dityatev, 2018; Gottschall and Howell, 2015). Based on our results, the reorganization of the ECM also appears important in homeostatic plasticity. Other ECM molecules

also were altered in their expression by suppression of neuronal activity, such as tenascin C (TNC), which exhibited reduced neuronal expression in response to TTX (Figure S4A). Reduced TNC might cause the increase of mEPSC amplitude we observed by reducing L-type voltage-gated calcium channel-mediated signaling (Evers et al., 2002; Wang et al., 2011).

Our *in vitro* model of network plasticity allows us to explore not only neuronal mechanisms of homeostatic plasticity but also the potential role of astrocytes in this process. In our study, we observed significant transcriptional changes in astrocytes exposed to neuronal activity suppression. For example, *Arc* (Figure S5A), an immediate-early gene (IEG), was up-regulated in its expression. In neurons, *Arc* expression is dynamically regulated by neuronal activity, and it modulates synaptic strength by controlling endocytosis of AMPA receptors at the synapse (Shepherd and Bear, 2011; Shepherd et al., 2006). It has previously been reported that *Arc* and other IEGs are also expressed in astrocytes (Rodriguez et al., 2008; Rubio, 1997; Kato et al., 1995). We speculate that *Arc* was transcribed and may be released from the astrocytes into the synapse, where it may modulate synaptic plasticity, as described for other astrocyte-secreted factors (Perez-Catalan et al., 2021; Wang et al., 2021). We also observed increased expression of *Egr3*, *Avpr1a*, and *Astn2* in TTX-exposed astrocytes (Figure S5A). *Avpr1a* belongs to the subfamily of G-protein-coupled receptors that bind arginine vasopressin (AVP), and it promotes LTP induction (Namba et al., 2016); *Egr3* is important for normal hippocampal LTD (Gallitano-Mendel et al., 2007); *Astn2* is a transmembrane protein that also modulates synaptic function by trafficking of neuroligins and synaptic proteins in Purkinje cells (Behesti et al., 2018). Together, these observations suggest that astrocytes increase the expression of genes that could modulate synaptic activity upon suppression of activity of (neighboring) neurons. Such findings indicate that the astrocytic contribution to homeostatic plasticity might be more pronounced than previously considered and should be studied more intensively.

Some limitations should be taken into account in the interpretation of our results. Considering that some subtypes of astrocytes exhibit sensitivity to TTX (McNeill et al., 2021; Sontheimer and Waxman, 1992), we cannot discriminate transcriptional changes directly related to suppression of neuronal activity and homeostatic plasticity mechanisms, from changes induced by TTX effects on astrocytes (that may or may not influence homeostatic plasticity). Comparing the gene expression profile of our TTX-treated neuron-astrocyte co-cultures with pure astrocyte cultures treated with TTX may help identify genes and processes induced by TTX treatment in astrocytes and provide a basis for testing their role in homeostatic plasticity. Also, the application of other methods to induce homeostatic



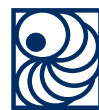

plasticity, more complex co-cultures (incorporating inhibitory neurons), and setups using human astrocytes in future studies could provide a more comprehensive understanding of homeostatic plasticity in human neuronal networks.

To conclude, we provide evidence that hiPSC-derived neuronal networks display homeostatic plasticity at the network and single-cell levels. Our *in vitro* model of network plasticity is versatile and allows investigation of human homeostatic plasticity mechanisms. It may also provide a platform for (high-throughput) drug screening, to explore whether specific compounds can be used to rescue altered or insufficient homeostatic plasticity in the context of brain disorders, such as NDDs.

## EXPERIMENTAL PROCEDURES

### Resource availability

#### Corresponding author

Nael Nadif Kasri: [n.nadif@donders.ru.nl](mailto:n.nadif@donders.ru.nl).

#### Materials availability

This study did not generate new unique reagents.

#### Data and code availability

The GEO accession number for the RNA-seq data in this paper is GSE225761.

### Human iPSC cell culture

In this study, we used three independent control hiPSC lines, including Ctrl1, Ctrl2, and Ctrl3. All of them were obtained by reprogramming skin fibroblasts and have been described in detail previously (Frega et al., 2019; Mossink et al., 2021). More details also can be found in our [supplemental experimental procedures](#). HiPSCs were cultured in Essential 8 Flex medium (Gibco, A2858501) supplemented with 0.1 mg/mL Primocin (Invivogen, ant-pm-2) on 6-well plates pre-coated with Matrigel (1:15 diluted in DMEM/F12 medium; Matrigel: Corning, #356231; DMEM/F12 medium: Gibco, 11320074) at 37°C, 5% CO<sub>2</sub>. See [supplemental experimental procedures](#) for full details.

### Neuronal differentiation

At DIV 0, hiPSCs were dissociated with Accutase (Sigma-Aldrich, A6964) to generate single cells. HiPSCs were then plated on micro-electrode array (MEA) plates (20,000 cells/well) or glass, nitric-acid-treated coverslips (20,000 cells/well) in Essential 8 medium (Gibco, A1517001) supplemented with Primocin (0.1 mg/mL, Invivogen, ant-pm-2), RevitaCell (1:100, Gibco, A2644501), and doxycycline (4 µg/mL). MEA plates and coverslips were pre-coated with 50 µg/mL poly-L-ornithine (Sigma-Aldrich, P4957) for 3 h at 37°C, 5% CO<sub>2</sub>, and 20 µg/mL human recombinant laminin (BioLamina, LN521) overnight at 4°C. See [supplemental experimental procedures](#) for full details.

### Procedure for TTX treatment and TTX withdrawal on MEA plates

The effect of TTX treatment was exclusively evaluated in neurons at DIV 49 due to the observed sensitivity of younger neurons to the

washing out process. This sensitivity was reflected by increased neuronal network activity at DIV 30, but not at DIV 49 after washing out TTX (Figure S1A). Nonetheless, similar to DIV 49 neurons, DIV 30 neuronal networks exhibited an increase in both mean NBR and mean BR following TTX treatment (Figures S1G and S1H). Additional information regarding procedure of TTX treatment and washing out is provided in the details in the [supplemental experimental procedures](#).

### MEA recordings and data analysis

All MEA recordings were performed using the 24-well MEA system (Multichannel Systems, MCS GmbH, Reutlingen, Germany). Recordings and data analysis procedures have been described previously in detail (Frega et al., 2019; Mossink et al., 2021). See [supplemental experimental procedures](#) for full details.

### Immunocytochemistry

Cells cultured on coverslips were fixed with 4% paraformaldehyde supplemented with 4% sucrose for 15 min at room temperature, followed by permeabilization with 0.2% Triton in PBS for 10 min at room temperature. Nonspecific binding sites were blocked by incubation in blocking buffer (PBS, 5% normal goat serum, 1% bovine serum albumin, 0.2% Triton) for 1 h at room temperature. Cells were incubated in a primary antibody solution wherein antibodies were diluted in blocking buffer overnight at 4°C. Secondary antibodies, conjugated to Alexa-fluorochromes, were diluted in blocking buffer and applied for 1 h at room temperature. Hoechst 33342 (Molecular Probes) was used to stain the nucleus before the cells were mounted using DAKO fluorescent mounting medium (DAKO). More details can be found in the [supplemental experimental procedures](#).

### RNA-seq

Cells were treated with or without 1 µM TTX (Tocris, 1069) at DIV 49 and harvested at DIV 51. In all conditions, hiPSC-derived neurons were co-cultured with rat astrocytes. For RNA-seq, the prepared samples were sequenced on an Illumina NovaSeq 6000 S1 platform at an average depth of >50 million reads per sample using a read length of 2\*100 base pairs. See [supplemental experimental procedures](#) for full details.

### RNA-seq data processing

RNA-seq reads were mapped against the hybrid human and rat reference genome (GRCh38+ Rnor6.0) with STAR/2.7.8a (Dobin et al., 2013) using ENCODE parameters. Gene quantification was performed with RSEM/1.3.0 (Li and Dewey, 2011) using the human gencode39 and rat ensembl104 annotations. See [supplemental experimental procedures](#) for full details.

### Quantification and statistical analysis

The statistical analysis of the data was performed using GraphPad Prism 9 (GraphPad Software, Inc., CA, USA). We first determined whether data were normally distributed. Significance analysis was done for different experimental conditions by one-way ANOVA or two-way ANOVA with post hoc Bonferroni correction when different cell lines, time lines, and drug-treated samples

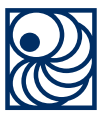

were included. Analysis was done using unpaired Student's t tests when comparing two conditions at a single time point. Results with  $p$  values  $< 0.05$  were considered as significantly different (\*),  $p < 0.005$  (\*\*),  $p < 0.0005$  (\*\*\*),  $p < 0.0001$  (\*\*\*\*). Data are shown as mean  $\pm$  standard error of the mean (SEM). All means, SEM, and test statistics are listed in [Table S3](#).

## SUPPLEMENTAL INFORMATION

Supplemental information can be found online at <https://doi.org/10.1016/j.stemcr.2023.09.011>.

## ACKNOWLEDGMENTS

The work was supported by funding from the European Community's Horizon 2020 Programme (H2020/2014–2020) under grant agreement no. 728018 (Eat2beNICE) (to B.F.); ERA-NET NEURON-102 SYNCHIZ grant (NWO) 013-17-003 4538 (to D.S.); China Scholarship Council 201906100038 (to X.Y.); ISCH/ MINECO (PT17/0009/0019) and FEDER (to A.E.C.); and M.M. was supported by an internal grant from the Donders Centre for Medical Neurosciences of the Radboud University Medical Center.

## AUTHOR CONTRIBUTIONS

X.Y., B.F., and N.N.K. conceived the hypothesis and designed the experiments. N.N.K., B.F., and D.S. supervised the study. X.Y., J.R.V.R., and U.C. performed the experiments. X.Y., S.P., J.R.V.R., U.C., and M.F. analyzed the data. A.E.C., M.M., S.R., and E.J.H.v.H. assisted in data analysis. A.O. and C.S. assisted in experiments. X.Y., S.P., and J.R.V.R. drafted the manuscript. All authors reviewed and edited the draft manuscript.

## DECLARATION OF INTERESTS

B.F. has received educational speaking fees from Medice.

Received: April 19, 2023

Revised: September 18, 2023

Accepted: September 19, 2023

Published: October 19, 2023

## REFERENCES

Ahlgren, H., Bas-Orth, C., Freitag, H.E., Hellwig, A., Ottersen, O.P., and Bading, H. (2014). The nuclear calcium signaling target, activating transcription factor 3 (ATF3), protects against dendrotoxicity and facilitates the recovery of synaptic transmission after an excitotoxic insult. *J. Biol. Chem.* *289*, 9970–9982. <https://doi.org/10.1074/jbc.M113.502914>.

Antoine, M.W., Langberg, T., Schnepel, P., and Feldman, D.E. (2019). Increased Excitation-Inhibition Ratio Stabilizes Synapse and Circuit Excitability in Four Autism Mouse Models. *Neuron* *101*, 648–661.e4. <https://doi.org/10.1016/j.neuron.2018.12.026>.

Bardy, C., van den Hurk, M., Kakaradov, B., Erwin, J.A., Jaeger, B.N., Hernandez, R.V., Eames, T., Paucar, A.A., Gorris, M., Marchand, C., et al. (2016). Predicting the functional states of human iPSC-derived neurons with single-cell RNA-seq and electrophysiology.

*Mol. Psychiatr.* *21*, 1573–1588. <https://doi.org/10.1038/mp.2016.158>.

Behesti, H., Fore, T.R., Wu, P., Horn, Z., Leppert, M., Hull, C., and Hatten, M.E. (2018). ASTN2 modulates synaptic strength by trafficking and degradation of surface proteins. *Proc. Natl. Acad. Sci. USA* *115*, E9717–E9726. <https://doi.org/10.1073/pnas.1809382115>.

Benevento, M., Iacono, G., Selten, M., Ba, W., Oudakker, A., Frega, M., Keller, J., Mancini, R., Lewerissa, E., Kleefstra, T., et al. (2016). Histone Methylation by the Kleefstra Syndrome Protein EHMT1 Mediates Homeostatic Synaptic Scaling. *Neuron* *91*, 341–355. <https://doi.org/10.1016/j.neuron.2016.06.003>.

Bikbaev, A., Frischknecht, R., and Heine, M. (2015). Brain extracellular matrix retains connectivity in neuronal networks. *Sci. Rep.* *5*, 14527. <https://doi.org/10.1038/srep14527>.

Bulow, P., Murphy, T.J., Bassell, G.J., and Wenner, P. (2019). Homeostatic Intrinsic Plasticity Is Functionally Altered in Fmr1 KO Cortical Neurons. *Cell Rep.* *26*, 1378–1388.e3. <https://doi.org/10.1016/j.celrep.2019.01.035>.

Castrén, E., Zafra, F., Thoenen, H., and Lindholm, D. (1992). Light regulates expression of brain-derived neurotrophic factor mRNA in rat visual cortex. *Proc. Natl. Acad. Sci. USA* *89*, 9444–9448. <https://doi.org/10.1073/pnas.89.20.9444>.

Chater, T.E., and Goda, Y. (2014). The role of AMPA receptors in postsynaptic mechanisms of synaptic plasticity. *Front. Cell. Neurosci.* *8*, 401. <https://doi.org/10.3389/fncel.2014.00401>.

Cordella, F., Ferrucci, L., D'Antoni, C., Ghirga, S., Brighi, C., Soloperto, A., Gigante, Y., Ragozzino, D., Bezzi, P., and Di Angelantonio, S. (2022). Human iPSC-Derived Cortical Neurons Display Homeostatic Plasticity. *Life* *12*, 1884. <https://doi.org/10.3390/life12111884>.

Dani, V.S., Chang, Q., Maffei, A., Turrigiano, G.G., Jaenisch, R., and Nelson, S.B. (2005). Reduced cortical activity due to a shift in the balance between excitation and inhibition in a mouse model of Rett syndrome. *Proc. Natl. Acad. Sci. USA* *102*, 12560–12565. <https://doi.org/10.1073/pnas.0506071102>.

Debanne, D., Inglebert, Y., and Russier, M. (2019). Plasticity of intrinsic neuronal excitability. *Curr. Opin. Neurobiol.* *54*, 73–82. <https://doi.org/10.1016/j.conb.2018.09.001>.

Debanne, D., and Russier, M. (2019). The contribution of ion channels in input-output plasticity. *Neurobiol. Learn. Mem.* *166*, 107095. <https://doi.org/10.1016/j.nlm.2019.107095>.

Delvendahl, I., Kita, K., and Müller, M. (2019). Rapid and sustained homeostatic control of presynaptic exocytosis at a central synapse. *Proc. Natl. Acad. Sci. USA* *116*, 23783–23789. <https://doi.org/10.1073/pnas.1909675116>.

Dityatev, A., and Schachner, M. (2003). Extracellular matrix molecules and synaptic plasticity. *Nat. Rev. Neurosci.* *4*, 456–468. <https://doi.org/10.1038/nrn1115>.

Dityatev, A., Schachner, M., and Sonderegger, P. (2010). The dual role of the extracellular matrix in synaptic plasticity and homeostasis. *Nat. Rev. Neurosci.* *11*, 735–746. <https://doi.org/10.1038/nrn2898>.

Dobin, A., Davis, C.A., Schlesinger, F., Drenkow, J., Zaleski, C., Jha, S., Batut, P., Chaisson, M., and Gingeras, T.R. (2013). STAR: ultrafast

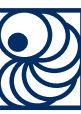

- universal RNA-seq aligner. *Bioinformatics* 29, 15–21. <https://doi.org/10.1093/bioinformatics/bts635>.
- Evers, M.R., Salmen, B., Bukalo, O., Rollenhagen, A., Bösl, M.R., Morellini, F., Bartsch, U., Dityatev, A., and Schachner, M. (2002). Impairment of L-type Ca<sup>2+</sup> channel-dependent forms of hippocampal synaptic plasticity in mice deficient in the extracellular matrix glycoprotein tenascin-C. *J. Neurosci.* 22, 7177–7194. <https://doi.org/10.1523/JNEUROSCI.22-16-07177.2002>.
- Ferrer-Ferrer, M., and Dityatev, A. (2018). Shaping Synapses by the Neural Extracellular Matrix. *Front. Neuroanat.* 12, 40. <https://doi.org/10.3389/fnana.2018.00040>.
- Figueiro-Silva, J., Gruart, A., Clayton, K.B., Podlesniy, P., Abad, M.A., Gasull, X., Delgado-García, J.M., and Trullas, R. (2015). Neuronal pentraxin 1 negatively regulates excitatory synapse density and synaptic plasticity. *J. Neurosci.* 35, 5504–5521. <https://doi.org/10.1523/JNEUROSCI.2548-14.2015>.
- Fox, K., and Stryker, M. (2017). Integrating Hebbian and homeostatic plasticity: introduction. *Philos. Trans. R. Soc. Lond. B Biol. Sci.* 372, 20160413. <https://doi.org/10.1098/rstb.2016.0413>.
- Frega, M., Linda, K., Keller, J.M., Gümüş-Akay, G., Mossink, B., van Rhijn, J.R., Negwer, M., Klein Gunnewiek, T., Foreman, K., Kompier, N., et al. (2019). Neuronal network dysfunction in a model for Kleefstra syndrome mediated by enhanced NMDAR signaling. *Nat. Commun.* 10, 4928. <https://doi.org/10.1038/s41467-019-12947-3>.
- Frega, M., van Gestel, S.H.C., Linda, K., van der Raadt, J., Keller, J., Van Rhijn, J.R., Schubert, D., Albers, C.A., and Nadif Kasri, N. (2017). Rapid Neuronal Differentiation of Induced Pluripotent Stem Cells for Measuring Network Activity on Micro-electrode Arrays. *Vis. Exp.* 119, e54900. <https://doi.org/10.3791/54900>.
- Frischknecht, R., and Gundelfinger, E.D. (2012). The brain's extracellular matrix and its role in synaptic plasticity. *Adv. Exp. Med. Biol.* 970, 153–171. [https://doi.org/10.1007/978-3-7091-0932-8\\_7](https://doi.org/10.1007/978-3-7091-0932-8_7).
- Fu, J.M., Satterstrom, F.K., Peng, M., Brand, H., Collins, R.L., Dong, S., Wamsley, B., Klei, L., Wang, L., Hao, S.P., et al. (2022). Rare coding variation provides insight into the genetic architecture and phenotypic context of autism. *Nat. Genet.* 54, 1320–1331. <https://doi.org/10.1038/s41588-022-01104-0>.
- Gallitano-Mendel, A., Izumi, Y., Tokuda, K., Zorumski, C.F., Howell, M.P., Muglia, L.J., Wozniak, D.F., and Milbrandt, J. (2007). The immediate early gene early growth response gene 3 mediates adaptation to stress and novelty. *Neuroscience* 148, 633–643. <https://doi.org/10.1016/j.neuroscience.2007.05.050>.
- Gottschall, P.E., and Howell, M.D. (2015). ADAMTS expression and function in central nervous system injury and disorders. *Matrix Biol.* 44–46, 70–76. <https://doi.org/10.1016/j.matbio.2015.01.014>.
- Grubb, M.S., and Burrone, J. (2010). Activity-dependent relocation of the axon initial segment fine-tunes neuronal excitability. *Nature* 465, 1070–1074. <https://doi.org/10.1038/nature09160>.
- Ibata, K., Sun, Q., and Turrigiano, G.G. (2008). Rapid synaptic scaling induced by changes in postsynaptic firing. *Neuron* 57, 819–826. <https://doi.org/10.1016/j.neuron.2008.02.031>.
- Hawk, J.D., and Abel, T. (2011). The role of NR4A transcription factors in memory formation. *Brain Res. Bull.* 85, 21–29. <https://doi.org/10.1016/j.brainresbull.2011.02.001>.
- Hou, Q., Zhang, D., Jarzylo, L., Haganir, R.L., and Man, H.Y. (2008). Homeostatic regulation of AMPA receptor expression at single hippocampal synapses. *Proc. Natl. Acad. Sci. USA* 105, 775–780. <https://doi.org/10.1073/pnas.0706447105>.
- Jakawich, S.K., Nasser, H.B., Strong, M.J., McCartney, A.J., Perez, A.S., Rakesh, N., Carruthers, C.J.L., and Sutton, M.A. (2010). Local presynaptic activity gates homeostatic changes in presynaptic function driven by dendritic BDNF synthesis. *Neuron* 68, 1143–1158. <https://doi.org/10.1016/j.neuron.2010.11.034>.
- Jeanneteau, F., Barrère, C., Vos, M., De Vries, C.J.M., Rouillard, C., Levesque, D., Dromard, Y., Moisan, M.P., Duric, V., Franklin, T.C., et al. (2018). The Stress-Induced Transcription Factor NR4A1 Adjusts Mitochondrial Function and Synapse Number in Prefrontal Cortex. *J. Neurosci.* 38, 1335–1350. <https://doi.org/10.1523/JNEUROSCI.2793-17.2017>.
- Karpova, N.N., Rantamäki, T., Di Lieto, A., Lindemann, L., Hoener, M.C., and Castrén, E. (2010). Darkness reduces BDNF expression in the visual cortex and induces repressive chromatin remodeling at the BDNF gene in both hippocampus and visual cortex. *Cell. Mol. Neurobiol.* 30, 1117–1123. <https://doi.org/10.1007/s10571-010-9544-6>.
- Kato, H., Kogure, K., Araki, T., and Itoyama, Y. (1995). Induction of Jun-like immunoreactivity in astrocytes in gerbil hippocampus with ischemic tolerance. *Neurosci. Lett.* 189, 13–16. [https://doi.org/10.1016/0304-3940\(95\)11437-2](https://doi.org/10.1016/0304-3940(95)11437-2).
- Koopmans, F., van Nierop, P., Andres-Alonso, M., Byrnes, A., Cijssouw, T., Coba, M.P., Cornelisse, L.N., Farrell, R.J., Goldschmidt, H.L., Howrigan, D.P., et al. (2019). SynGO: An Evidence-Based, Expert-Curated Knowledge Base for the Synapse. *Neuron* 103, 217–234.e4. <https://doi.org/10.1016/j.neuron.2019.05.002>.
- Kuba, H., Oichi, Y., and Ohmori, H. (2010). Presynaptic activity regulates Na<sup>+</sup> channel distribution at the axon initial segment. *Nature* 465, 1075–1078. <https://doi.org/10.1038/nature09087>.
- Kuba, H., Yamada, R., Ishiguro, G., and Adachi, R. (2015). Redistribution of Kv1 and Kv7 enhances neuronal excitability during structural axon initial segment plasticity. *Nat. Commun.* 6, 8815. <https://doi.org/10.1038/ncomms9815>.
- Leblond, C.S., Le, T.L., Malesys, S., Cliquet, F., Tabet, A.C., Delorme, R., Rolland, T., and Bourgeron, T. (2021). Operative list of genes associated with autism and neurodevelopmental disorders based on database review. *Mol. Cell. Neurosci.* 113, 103623. <https://doi.org/10.1016/j.mcn.2021.103623>.
- Lee, K.Y., Jewett, K.A., Chung, H.J., and Tsai, N.P. (2018). Loss of fragile X protein FMRP impairs homeostatic synaptic downscaling through tumor suppressor p53 and ubiquitin E3 ligase Nedd4-2. *Hum. Mol. Genet.* 27, 2805–2816. <https://doi.org/10.1093/hmg/ddy189>.
- Li, B., and Dewey, C.N. (2011). RSEM: accurate transcript quantification from RNA-Seq data with or without a reference genome. *BMC Bioinf.* 12, 323. <https://doi.org/10.1186/1471-2105-12-323>.
- Lindskog, M., Li, L., Groth, R.D., Poburko, D., Thiagarajan, T.C., Han, X., and Tsien, R.W. (2010). Postsynaptic GluA1 enables acute retrograde enhancement of presynaptic function to coordinate adaptation to synaptic inactivity. *Proc. Natl. Acad. Sci. USA* 107, 21806–21811. <https://doi.org/10.1073/pnas.1016399107>.



- Lines, J., Martin, E.D., Kofuji, P., Aguilar, J., and Araque, A. (2020). Astrocytes modulate sensory-evoked neuronal network activity. *Nat. Commun.* *11*, 3689. <https://doi.org/10.1038/s41467-020-17536-3>.
- Lizen, B., Moens, C., Mouheiche, J., Sacré, T., Ahn, M.T., Jeannotte, L., Salti, A., and Gofflot, F. (2017). Conditional Loss of Hoxa5 Function Early after Birth Impacts on Expression of Genes with Synaptic Function. *Front. Mol. Neurosci.* *10*, 369. <https://doi.org/10.3389/fnmol.2017.00369>.
- Man, H.Y. (2011). GluA2-lacking, calcium-permeable AMPA receptors—inducers of plasticity? *Curr. Opin. Neurobiol.* *21*, 291–298. <https://doi.org/10.1016/j.conb.2011.01.001>.
- McCready, F.P., Gordillo-Sampedro, S., Pradeepan, K., Martinez-Trujillo, J., and Ellis, J. (2022). Multielectrode Arrays for Functional Phenotyping of Neurons from Induced Pluripotent Stem Cell Models of Neurodevelopmental Disorders. *Biology* *11*, 316. <https://doi.org/10.3390/biology11020316>.
- McNeill, J., Rudyk, C., Hildebrand, M.E., and Salmaso, N. (2021). Ion Channels and Electrophysiological Properties of Astrocytes: Implications for Emergent Stimulation Technologies. *Front. Cell. Neurosci.* *15*, 644126. <https://doi.org/10.3389/fncel.2021.644126>.
- Meijer, M., Rehbach, K., Brunner, J.W., Classen, J.A., Lammertse, H.C.A., van Linge, L.A., Schut, D., Krutenko, T., Hebisch, M., Cornelisse, L.N., et al. (2019). A Single-Cell Model for Synaptic Transmission and Plasticity in Human iPSC-Derived Neurons. *Cell Rep.* *27*, 2199–2211.e6. <https://doi.org/10.1016/j.celrep.2019.04.058>.
- Mossink, B., Verboven, A.H.A., van Hugte, E.J.H., Klein Gunnewiek, T.M., Parodi, G., Linda, K., Schoenmaker, C., Kleefstra, T., Kozicz, T., van Bokhoven, H., et al. (2021). Human neuronal networks on micro-electrode arrays are a highly robust tool to study disease-specific genotype-phenotype correlations *in vitro*. *Stem Cell Rep.* *16*, 2182–2196. <https://doi.org/10.1016/j.stemcr.2021.07.001>.
- Moulin, T.C., Rayée, D., Williams, M.J., and Schiöth, H.B. (2020). The Synaptic Scaling Literature: A Systematic Review of Methodologies and Quality of Reporting. *Front. Cell. Neurosci.* *14*, 164. <https://doi.org/10.3389/fncel.2020.00164>.
- Namba, T., Taniguchi, M., Murata, Y., Tong, J., Wang, Y., Okutani, F., Yamaguchi, M., and Kaba, H. (2016). Activation of arginine vasopressin receptor 1a facilitates the induction of long-term potentiation in the accessory olfactory bulb of male mice. *Neurosci. Lett.* *634*, 107–113. <https://doi.org/10.1016/j.neulet.2016.09.056>.
- Niedringhaus, M., Chen, X., Conant, K., and Dzakpasu, R. (2013). Synaptic potentiation facilitates memory-like attractor dynamics in cultured *in vitro* hippocampal networks. *PLoS One* *8*, e57144. <https://doi.org/10.1371/journal.pone.0057144>.
- Odawara, A., Katoh, H., Matsuda, N., and Suzuki, I. (2016). Physiological maturation and drug responses of human induced pluripotent stem cell-derived cortical neuronal networks in long-term culture. *Sci. Rep.* *6*, 26181. <https://doi.org/10.1038/srep26181>.
- Perez-Catalan, N.A., Doe, C.Q., and Ackerman, S.D. (2021). The role of astrocyte-mediated plasticity in neural circuit development and function. *Neural Dev.* *16*, 1. <https://doi.org/10.1186/s13064-020-00151-9>.
- Pre, D., Wooten, A.T., Biesmans, S., Hinckley, S., Zhou, H., Sherman, S.P., Kakad, P., Gearhart, J., and Bang, A.G. (2022). Development of a platform to investigate long-term potentiation in human iPSC-derived neuronal networks. *Stem Cell Rep.* <https://doi.org/10.1016/j.stemcr.2022.07.012>.
- Rodríguez, J.J., Davies, H.A., Errington, M.L., Verkhratsky, A., Bliss, T.V.P., and Stewart, M.G. (2008). ARG3.1/ARC expression in hippocampal dentate gyrus astrocytes: ultrastructural evidence and colocalization with glial fibrillary acidic protein. *J. Cell Mol. Med.* *12*, 671–678. <https://doi.org/10.1111/j.1582-4934.2007.00105.x>.
- Rubio, N. (1997). Interferon-gamma induces the expression of immediate early genes c-fos and c-jun in astrocytes. *Immunology* *91*, 560–564. <https://doi.org/10.1046/j.1365-2567.1997.00305.x>.
- Schaukowitch, K., Reese, A.L., Kim, S.K., Kilaru, G., Joo, J.Y., Kavali, E.T., and Kim, T.K. (2017). An Intrinsic Transcriptional Program Underlying Synaptic Scaling during Activity Suppression. *Cell Rep.* *18*, 1512–1526. <https://doi.org/10.1016/j.celrep.2017.01.033>.
- Shepherd, J.D., and Bear, M.F. (2011). New views of Arc, a master regulator of synaptic plasticity. *Nat. Neurosci.* *14*, 279–284. <https://doi.org/10.1038/nn.2708>.
- Shepherd, J.D., Rumbaugh, G., Wu, J., Chowdhury, S., Plath, N., Kuhl, D., Hugarir, R.L., and Worley, P.F. (2006). Arc/Arg3.1 mediates homeostatic synaptic scaling of AMPA receptors. *Neuron* *52*, 475–484. <https://doi.org/10.1016/j.neuron.2006.08.034>.
- Soares, C., Lee, K.F.H., Nassrallah, W., and Béique, J.C. (2013). Differential subcellular targeting of glutamate receptor subtypes during homeostatic synaptic plasticity. *J. Neurosci.* *33*, 13547–13559. <https://doi.org/10.1523/JNEUROSCI.1873-13.2013>.
- Sontheimer, H., and Waxman, S.G. (1992). Ion channels in spinal cord astrocytes *in vitro*. II. Biophysical and pharmacological analysis of two Na<sup>+</sup> current types. *J. Neurophysiol.* *68*, 1001–1011. <https://doi.org/10.1152/jn.1992.68.4.1001>.
- Suresh, J., Radojicic, M., Pesce, L.L., Bhansali, A., Wang, J., Tryba, A.K., Marks, J.D., and van Drongelen, W. (2016). Network burst activity in hippocampal neuronal cultures: the role of synaptic and intrinsic currents. *J. Neurophysiol.* *115*, 3073–3089. <https://doi.org/10.1152/jn.00995.2015>.
- Sutton, M.A., Ito, H.T., Cressy, P., Kempf, C., Woo, J.C., and Schuman, E.M. (2006). Miniature neurotransmission stabilizes synaptic function via tonic suppression of local dendritic protein synthesis. *Cell* *125*, 785–799. <https://doi.org/10.1016/j.cell.2006.03.040>.
- Tien, N.W., and Kerschensteiner, D. (2018). Homeostatic plasticity in neural development. *Neural Dev.* *13*, 9. <https://doi.org/10.1186/s13064-018-0105-x>.
- Turrigiano, G. (2012). Homeostatic synaptic plasticity: local and global mechanisms for stabilizing neuronal function. *Cold Spring Harbor Perspect. Biol.* *4*, a005736. <https://doi.org/10.1101/cshperspect.a005736>.
- Turrigiano, G. (2011). Too many cooks? Intrinsic and synaptic homeostatic mechanisms in cortical circuit refinement. *Annu. Rev. Neurosci.* *34*, 89–103. <https://doi.org/10.1146/annurev-neuro-060909-153238>.
- Turrigiano, G.G., Leslie, K.R., Desai, N.S., Rutherford, L.C., and Nelson, S.B. (1998). Activity-dependent scaling of quantal





- amplitude in neocortical neurons. *Nature* 391, 892–896. <https://doi.org/10.1038/36103>.
- Valakh, V., Wise, D., Zhu, X.A., Sha, M., Fok, J., Van Hooser, S.D., Schectman, R., Cepeda, I., Kirk, R., O'Toole, S.M., and Nelson, S.B. (2023). A transcriptional constraint mechanism limits the homeostatic response to activity deprivation in mammalian neocortex. *Elife* 12, e74899. <https://doi.org/10.7554/eLife.74899>.
- van Hugte, E., and Nadif Kasri, N. (2019). Modeling Psychiatric Diseases with Induced Pluripotent Stem Cells. *Adv. Exp. Med. Biol.* 1192, 297–312. [https://doi.org/10.1007/978-981-32-9721-0\\_15](https://doi.org/10.1007/978-981-32-9721-0_15).
- Wang, H.L., Zhang, Z., Hintze, M., and Chen, L. (2011). Decrease in calcium concentration triggers neuronal retinoic acid synthesis during homeostatic synaptic plasticity. *J. Neurosci.* 31, 17764–17771. <https://doi.org/10.1523/JNEUROSCI.3964-11.2011>.
- Wang, Y., Fu, W.Y., Cheung, K., Hung, K.W., Chen, C., Geng, H., Yung, W.H., Qu, J.Y., Fu, A.K.Y., and Ip, N.Y. (2021). Astrocyte-secreted IL-33 mediates homeostatic synaptic plasticity in the adult hippocampus. *Proc. Natl. Acad. Sci. USA* 118. e2020810118. <https://doi.org/10.1073/pnas.2020810118>.
- Watson, J.F., Ho, H., and Greger, I.H. (2017). Synaptic transmission and plasticity require AMPA receptor anchoring via its N-terminal domain. *Elife* 6, e23024. <https://doi.org/10.7554/eLife.23024>.
- Watt, A.J., and Desai, N.S. (2010). Homeostatic Plasticity and STDP: Keeping a Neuron's Cool in a Fluctuating World. *Front. Synaptic Neurosci.* 2, 5. <https://doi.org/10.3389/fnsyn.2010.00005>.
- Wefelmeyer, W., Puhl, C.J., and Burrone, J. (2016). Homeostatic Plasticity of Subcellular Neuronal Structures: From Inputs to Outputs. *Trends Neurosci.* 39, 656–667. <https://doi.org/10.1016/j.tins.2016.08.004>.
- Yu, H., Su, Y., Shin, J., Zhong, C., Guo, J.U., Weng, Y.L., Gao, F., Geschwind, D.H., Coppola, G., Ming, G.L., and Song, H. (2015). Tet3 regulates synaptic transmission and homeostatic plasticity via DNA oxidation and repair. *Nat. Neurosci.* 18, 836–843. <https://doi.org/10.1038/nn.4008>.
- Zeng, L.H., Ouyang, Y., Gazit, V., Cirrito, J.R., Jansen, L.A., Ess, K.C., Yamada, K.A., Wozniak, D.F., Holtzman, D.M., Gutmann, D.H., and Wong, M. (2007). Abnormal glutamate homeostasis and impaired synaptic plasticity and learning in a mouse model of tuberous sclerosis complex. *Neurobiol. Dis.* 28, 184–196. <https://doi.org/10.1016/j.nbd.2007.07.015>.
- Zhang, Z., Marro, S.G., Zhang, Y., Arendt, K.L., Patzke, C., Zhou, B., Fair, T., Yang, N., Südhof, T.C., Wernig, M., and Chen, L. (2018). The fragile X mutation impairs homeostatic plasticity in human neurons by blocking synaptic retinoic acid signaling. *Sci. Transl. Med.* 10, eaar4338. <https://doi.org/10.1126/scitranslmed.aar4338>.
- Zhou, W., Li, X., Liu, M., Zhao, Y., Zhu, G., and Luo, Q. (2009). Homeostatically regulated synchronized oscillations induced by short-term tetrodotoxin treatment in cultured neuronal network. *Biosystems* 95, 61–66. <https://doi.org/10.1016/j.biosystems.2008.06.008>.



**Stem Cell Reports, Volume 18**

## **Supplemental Information**

### **A human *in vitro* neuronal model for studying homeostatic plasticity at the network level**

**Xiuming Yuan, Sofía Puvogel, Jon-Ruben van Rhijn, Umami Ciptasari, Anna Esteve-Codina, Mandy Meijer, Simon Rouschop, Eline J.H. van Hugte, Astrid Oudakker, Chantal Schoenmaker, Monica Frega, Dirk Schubert, Barbara Franke, and Nael Nadif Kasri**

## Supplemental information

Supplemental information includes the five supplemental figures, supplemental discussion, four supplemental tables, supplemental experimental procedures, and supplemental references.

### Supplemental items

Supplemental Figure S1. Quantification of microelectrode array (MEA) parameters in Ctrl2 and Ctrl3 neurons. Related to Figure 1.

Supplemental Figure S2. Effect of 1-naphthyl acetyl spermine trihydrochloride (NASPM) treatment on the neuronal network activity. Related to Figure 2.

Supplemental Figure S3. Miniature excitatory postsynaptic current (mEPSC) activity in Ctrl 3 neurons. Related to Figure 3.

Supplemental Figure S4. Gene expression changes in tetrodotoxin (TTX)-treated neurons. Related to Figure 4.

Supplemental Figure S5. Astrocytes and neurons share some transcriptional changes in response to TTX-induced neuronal activity suppression. Related to Figure 5.

### Supplemental tables (Table S1-3 were added as separate excel files)

Table S1: Tab 1, Results from differential expression analysis for human induced pluripotent stem cell (hiPSC)-derived neurons treated with TTX for 48 h, related to Figure 4. Tab 2, Results from gene ontology (GO) enrichment analysis for hiPSC-derived neurons treated with TTX for 48 h, related to Figure 4. Tab 3 and 4, Results from comparison between differentially expressed genes (DEGs) in hiPSC-derived neurons induced by TTX treatment and genes related to neurodevelopmental disorders (NDDs) as well as confident autism-related genes, related to Figure 4. Tab 5, Results from SYNGO analysis for human induced pluripotent stem cell (hiPSC)-derived neurons treated with TTX for 48 h, related to Figure 4.

Table S2: Tab 1, Results from differential expression analysis for rat astrocytes treated with TTX for 48 h, related to Figure 5. Tab 2, Results from GO enrichment analysis for rat astrocytes treated with TTX for 48 h, related to Figure 5. Tab 3 and 4, Results from comparison between DEGs in rat astrocytes induced by TTX treatment and genes related to NDDs as well as confident autism-related genes, related to Figure 5. Tab 5, Results from SYNGO analysis for rat astrocytes treated with TTX for 48 h, related to Figure 5.

Table S3: Statistics per figure, including all means, SEM and test statistics.

Table S4: List of quantitative polymerase chain reaction (q-PCR) primers used in this study (added in this manuscript), related to Figure 5.

### Supplemental experimental procedures

hiPSC line origin and generation information

Human iPSCs cell culture

Neuronal differentiation

Procedure for TTX treatment and TTX withdrawal on MEA plates

Immunocytochemistry

Chemicals

MEA recordings and data analysis

Whole cell patch clamp

RNA-Sequencing

RNA-Seq data processing

Gene expression analysis

Cross correlation

NBQX treatment procedure

## Supplemental items

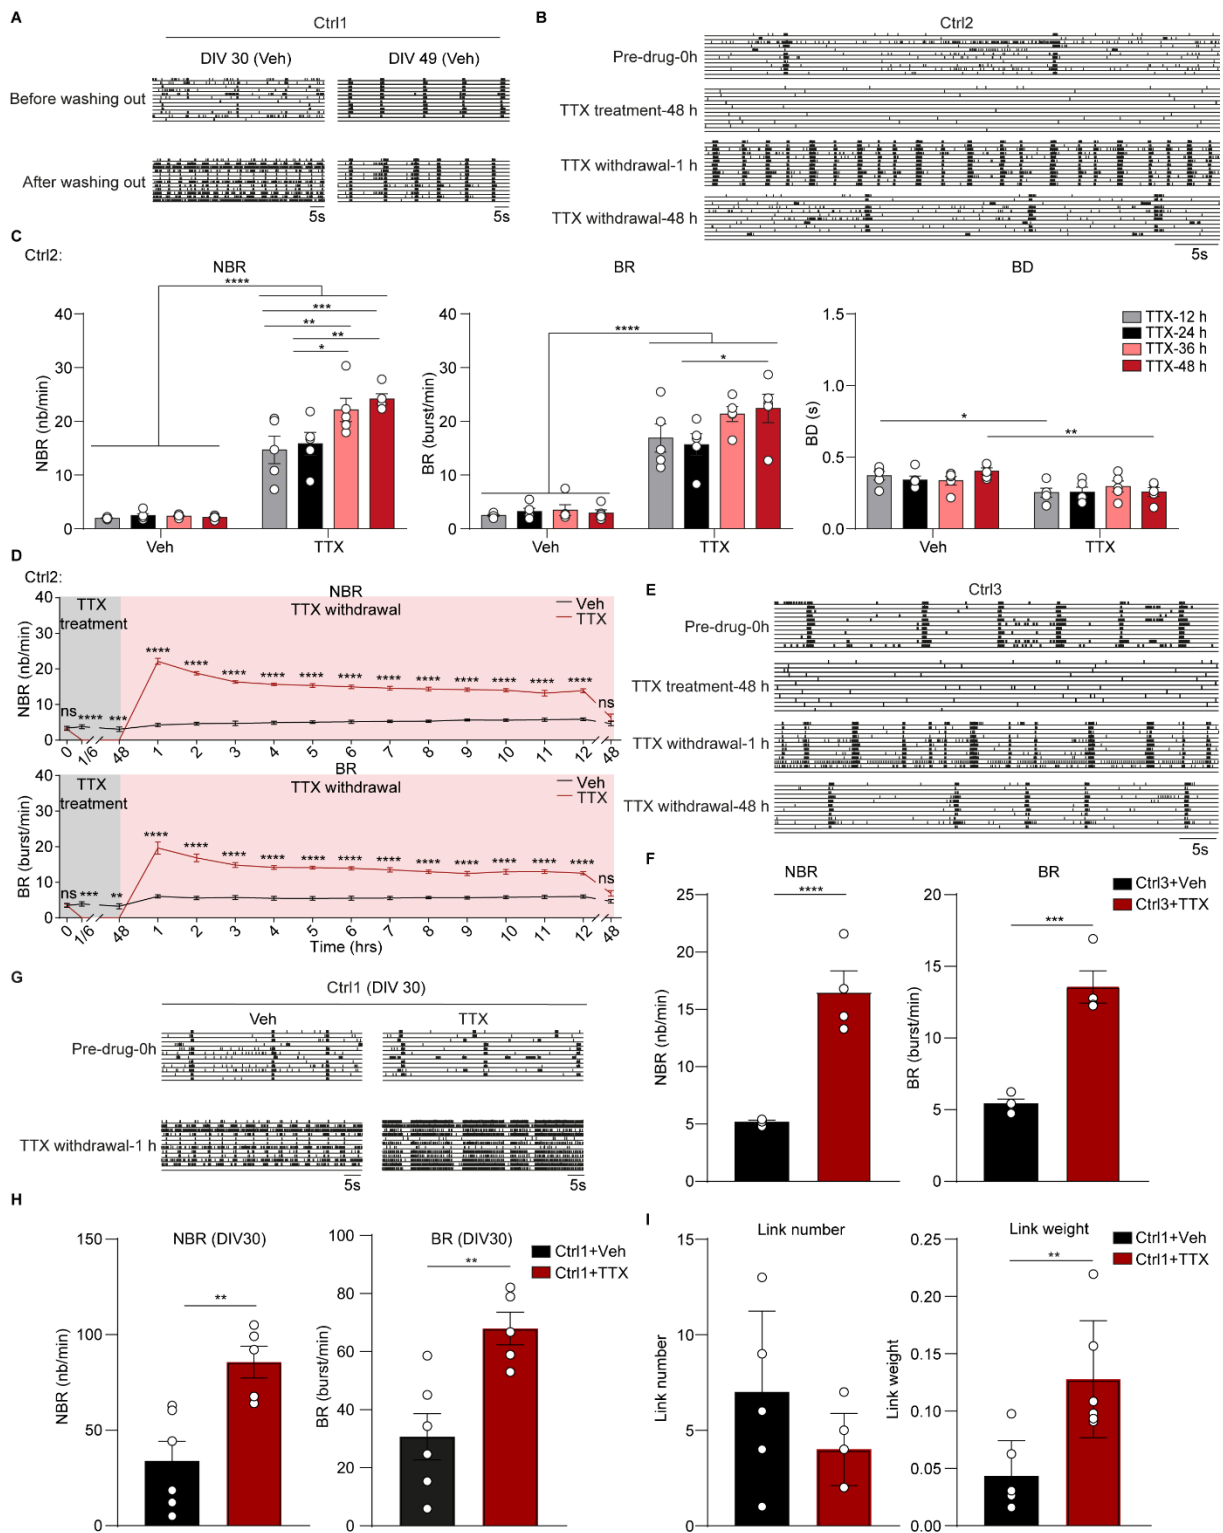

**Supplemental Figure S1. Quantification of microelectrode arrays (MEAs) parameters in Ctrl2 and Ctrl3 neurons. Related to Figure 1.**(A) Representative raster plots showing 1 min of spontaneous activity from hiPSC-derived neuronal networks (Ctrl1) before and after washing out procedure at days *in vitro* (DIV) 30 and DIV 49. (B) Representative raster plots showing 1 min of spontaneous activity from hiPSC-derived neuronal networks (Ctrl2) before and after TTX treatment, including before addition of TTX (Pre-drug-0 h), 48 h after addition of TTX (TTX treatment-48 h), 1 h after TTX withdrawal (TTX withdrawal-1 h), and 48 h after TTX withdrawal (TTX withdrawal-48 h). (C) Bar graphs showing the effect

of 12 h, 24 h, 36 h, and 48 h TTX treatment on the mean network burst rate (NBR), mean burst rate (BR), and mean burst duration (BD) for Ctrl2 neuronal networks. All MEA parameters were measured 1 h after TTX withdrawal. n = number of MEA wells/batches: Veh n = 5/1 for each group, TTX n = 5/1 for each group. (D) Quantification of NBR and BR over time for vehicle-treated (Veh) and 48 h TTX-treated (TTX) neurons (Ctrl2). n = number of MEA wells/batches: Veh n = 8/2, TTX n = 10/2. (E) Representative raster plots showing 1 min of spontaneous activity from hiPSC-derived neuronal networks (Ctrl3) before and after TTX treatment, including before addition of TTX (Pre-drug-0 h), 48 h after addition of TTX (TTX treatment-48 h), 1 h after TTX withdrawal (TTX withdrawal-1 h), and 48 h after TTX withdrawal (TTX withdrawal-48 h). (F) Bar graphs showing the quantification of NBR and BR for (E) at TTX withdrawal-1 h. n = number of MEA wells/batches: Veh n = 4/1, TTX n = 4/1. (G) Representative raster plots showing 1 min of spontaneous activity from hiPSC-derived neuronal networks (Ctrl1) before and after TTX treatment at DIV 30, including before addition of TTX (Pre-drug-0h) and 1 h after TTX withdrawal (TTX withdrawal-1 h). (H) Bar graphs showing the quantification of NBR and BR for (G) at TTX withdrawal-1 h. n = number of MEA wells/batches: Veh n = 6/1, TTX n = 5/1. (I) Comparison of the number of links and weight of links between vehicle-treated (Veh) and TTX-treated (TTX) conditions in Ctrl1 neuronal networks. n = number of MEA wells/batches: Veh n = 6/1, TTX n = 6/1. Data represent means  $\pm$  SEM. ns: not significant, \*P < 0.05, \*\*P < 0.005, \*\*\*P < 0.0005, \*\*\*\*P < 0.0001. For panel C and D, two-way ANOVA test followed by a *post-hoc* Bonferroni correction was performed between conditions. For panel F and H, unpaired Student's T-test was performed between two groups. For panel I, Mann Whitney U test with Bonferroni correction for multiple testing was performed between conditions. All means, SEM and test statistics are listed in Table S3.

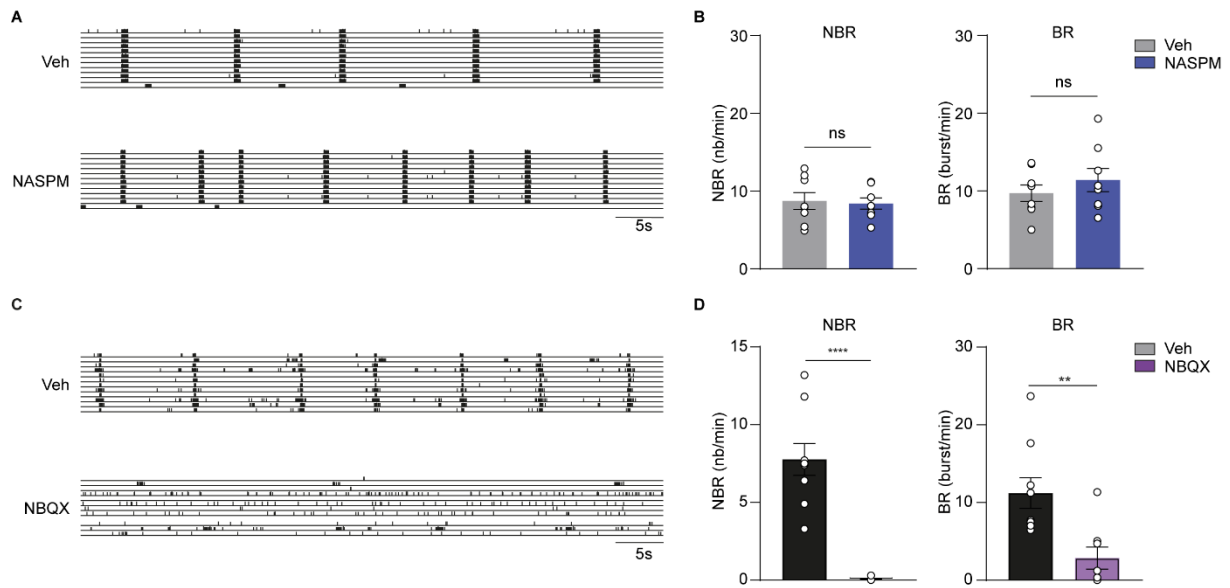

**Supplemental Figure S2. Effect of 1-naphthyl acetyl spermine trihydrochloride (NASPM) treatment on the neuronal network activity. Related to Figure 2.** (A) Representative raster plots showing 1 min of spontaneous activity from Ctrl1 neuronal networks grown on MEAs at DIV 49. Where indicated, the cells were vehicle-treated (Veh), or cells were treated with 10  $\mu$ M NASPM before TTX application (NASPM). (B) Bar graphs showing the quantification of NBR and BR for (A).  $n$  = number of MEA wells/batches: Veh  $n$  = 8/2, NASPM  $n$  = 8/2. (C) Representative raster plots showing 1 min of spontaneous activity from Ctrl1 neuronal networks grown on MEAs at DIV 49. Where indicated, the cells were vehicle-treated (Veh), or cells were treated with 50  $\mu$ M NBQX (NBQX). (D) Bar graphs showing the quantification of NBR and BR for (C).  $n$  = number of MEA wells/batches: Veh  $n$  = 9/1, NBQX  $n$  = 8/1. Data represent means  $\pm$  SEM. ns: not significant, \*\* $P$  < 0.005, \*\*\*\* $P$  < 0.0001. For panel B and D, unpaired Student's T-test was performed between two groups. All means, SEM and test statistics are listed in Table S3.



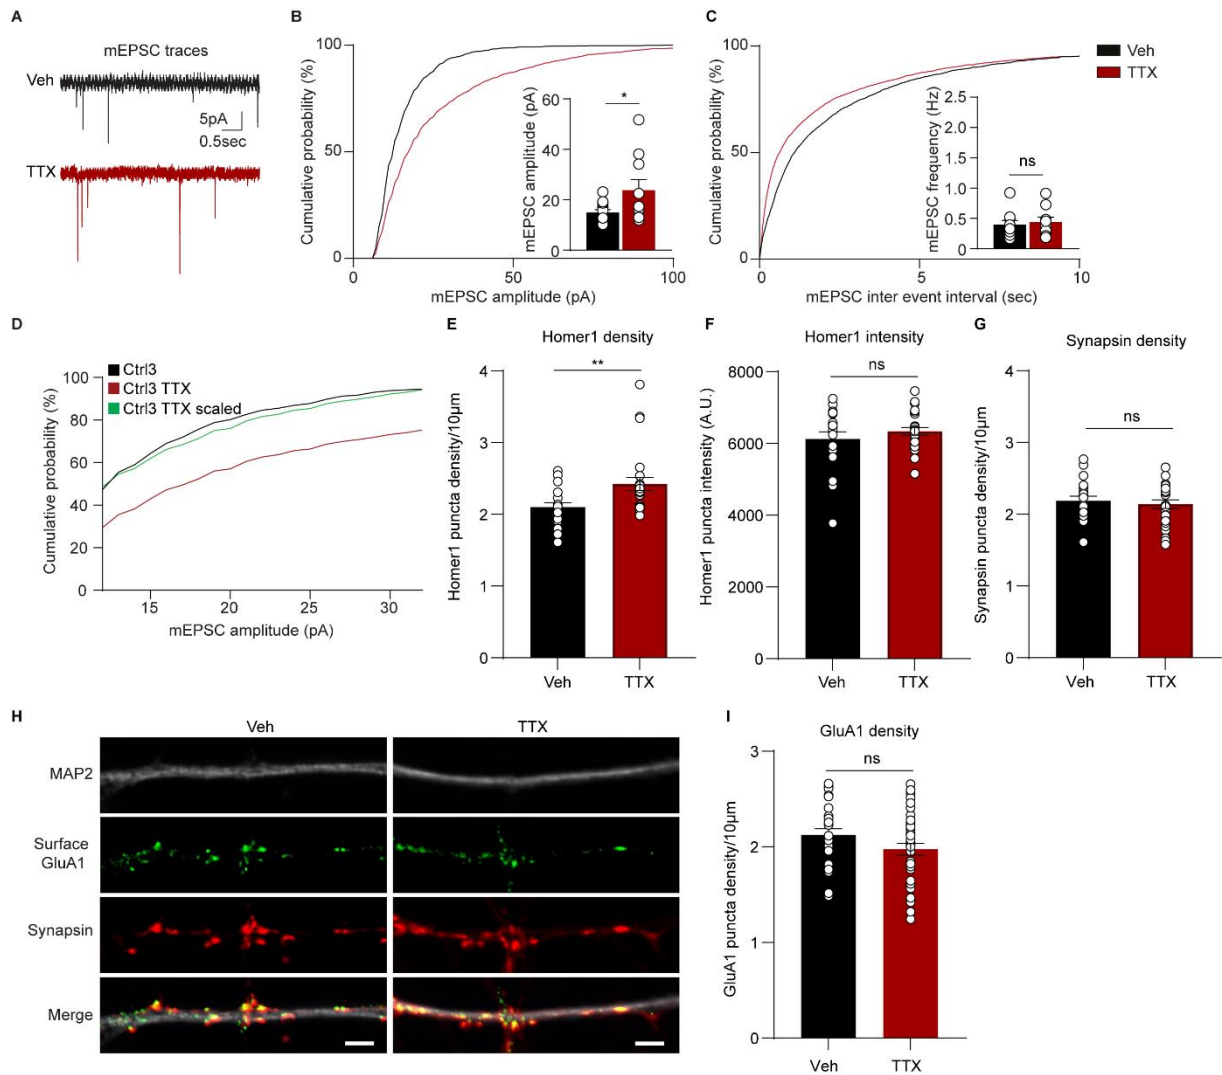

**Supplemental Figure S3: Miniature excitatory postsynaptic current (mEPSC) activity in Ctrl 3 neurons. Related to Figure 3.** (A) Representative mEPSC traces of vehicle-treated (Veh) and 48 h-TTX treated (TTX) neurons (Ctrl3). (B-D) Quantification of the amplitude (B) and frequency of mEPSCs (C) in Veh and TTX conditions.  $n =$  number of cells/batches: Veh  $n = 11/3$ , TTX  $n = 10/3$ . Rescaled cumulative mEPSC amplitude (Scaling = TTX values \* 1.19) (D). (E-G) Quantification of Homer1 puncta (number per 10  $\mu$ m), Homer1 puncta intensity (A.U., averaged corrected integrated density per unit), and Synapsin1/2 puncta (number per 10  $\mu$ m).  $n =$  number of cells/batches: Veh  $n = 20/1$ , TTX  $n = 25/1$ . (H) Representative images of vehicle-treated (Veh) and 48 h TTX-treated (TTX) neurons (Ctrl1) stained for MAP2 (grey), GluA1 (green), and synapsin 1/2 (red) (scale bar 5  $\mu$ m). (I) Quantification of Synapsin/GluA1 co-localized puncta (number per 10  $\mu$ m).  $n =$  number of cells/batches: Veh  $n = 25/1$ , TTX  $n = 37/1$ . Data represent means  $\pm$  SEM. ns: not significant, \* $P < 0.05$ , \*\* $P < 0.005$ , unpaired Student's T-test was performed between two groups. All means, SEM and test statistics are listed in Table S3.

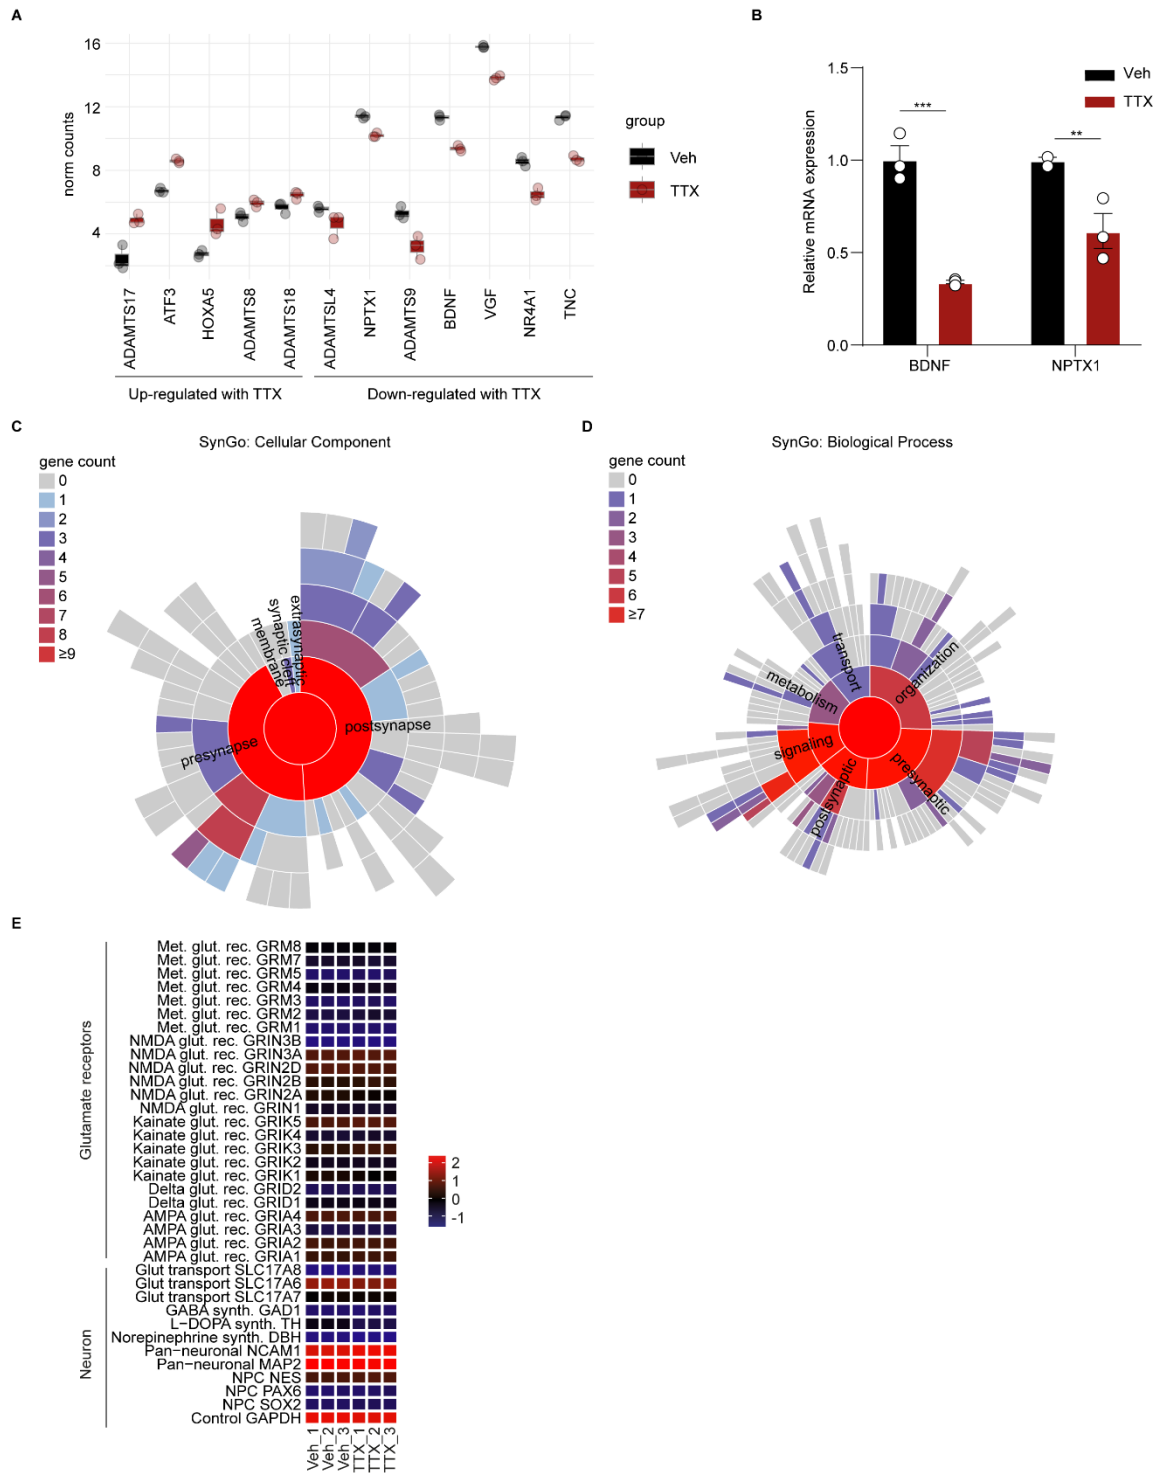

**Supplemental Figure S4. Gene expression changes in TTX-treated neurons. Related to Figure 4.** (A) Boxplot depicting the expression of selected DEGs (DESeq2 normalized counts), in both TTX- (red) and vehicle-treated neurons (black). (B) Bar graph showing relative messenger RNA (mRNA) expression of selected genes in TTX treated neurons (TTX-treated neurons = red, and vehicle-treated neurons = black).  $n = 3$  replicates for each group. Data represent means  $\pm$  SEM.  $**P < 0.005$ ,  $***P < 0.0005$ , two-way ANOVA test followed by a *post-hoc* Bonferroni correction was performed between conditions. All means, SEM and test statistics are listed in Table S3. (C-D) Sunburst plots for synaptic GO analysis of DEGs in response to TTX treatment in hiPSC-derived neurons (Ctrl1, absolute

$\log_2$  fold change ( $\text{Log}_2\text{FC}$ ) > 0.58 and adjusted P value < 0.05), including Cellular Component (C) and Biological Process (D). 41 DEGs have a Cellular Component annotation, 30 DEGs for Biological Processes (a gene may have multiple annotations). 0 Cellular Component terms are significantly enriched at 1% FDR (testing terms with at least three matching input genes), 0 for Biological Processes. Enrichment analyses were performed using 1-sided Fisher exact tests (with “greater than” for the alternative hypothesis) and the False Discovery Rate (FDR) method was applied for multiple testing correction. Synaptic GO analysis was performed with the SynGo (Koopmans et al., 2019). Warmer colors represent the predominance of genes associated with the respective pathway. (E) Heatmap depicting scaled expression of glutamate receptors and neuronal marker genes in TTX- and vehicle-treated neurons. Scale bar: scaled gene expression.

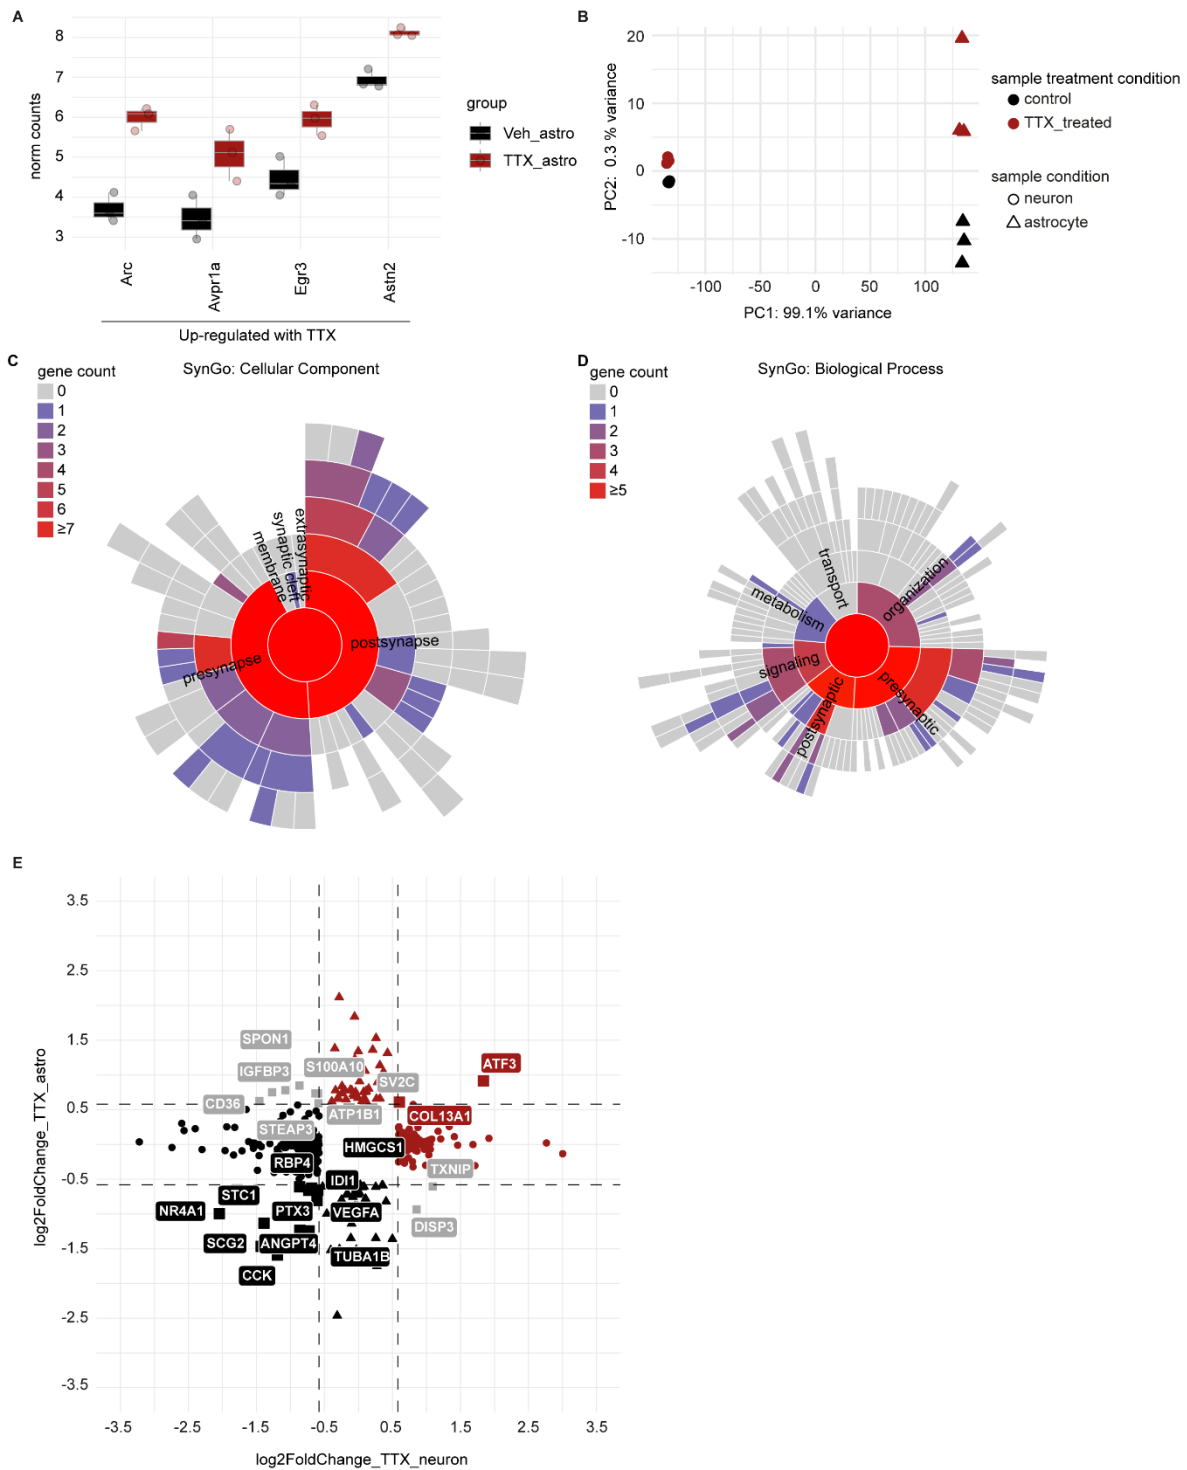

**Supplemental Figure S5. Astrocytes and neurons share some transcriptional changes in response to TTX-induced neuronal activity suppression. Related to Figure 5.** (A) Boxplot depicting the expression of selected DEGs (DESeq2 normalized counts), in both TTX- (red) and vehicle-exposed astrocytes (black). (B) Principal component analysis (PCA) of integrated RNA-sequencing counts from six samples of rat astrocytes and six samples of hiPSC-derived neurons. Shape of the points indicates the cell type (triangle = astrocyte, dot = neuron), and its colour depicts the received treatment (red = TTX and black = vehicle). (C-D) Sunburst plots for synaptic GO analysis of DEGs in response to TTX treatment in rat astrocytes co-cultured with hiPSC-derived neurons (Ctrl1, absolute  $\log_2$  fold change ( $\text{Log}_2\text{FC}$ ) > 0.58 and adjusted P value < 0.05), including Cellular Component (C) and Biological Process (D). 20 DEGs have a Cellular Component annotation, 14 DEGs for Biological Processes (a gene may have multiple annotations). 2 Cellular Component terms are significantly enriched at 1% FDR (testing

terms with at least three matching input genes), 0 for Biological Processes. Enrichment analyses were performed using 1-sided Fisher exact tests (with “greater than” for the alternative hypothesis) and the False Discovery Rate (FDR) method was applied for multiple testing correction. Synaptic GO analysis was performed with the SynGo (Koopmans *et al.*, 2019). Warmer colors represent the predominance of genes associated with the respective pathway. (E) Four-way volcano plot depicting expression changes per cell type in co-cultures of hiPSC-derived neurons and rat astrocytes treated with TTX (absolute  $\text{Log}_2\text{FC} > 0.58$  and adjusted  $p$  value  $< 0.05$ ). Each data point represents a gene. Triangles depict DEGs only in astrocytes, circles indicate DEGs only in neurons, while squares depict DEGs in both astrocytes and neurons exposed to TTX. Color indicates the direction of change in gene expression activity in response to TTX treatment (red = up-regulated expression, black = down-regulated expression, gray = divergent direction in change in gene expression activity between the two cell types).



## Supplemental discussion

Although not statistically over-represented, several genes differentially expressed by TTX-treatment have previously been associated with increased risk of neurodevelopmental disorders (NDDs) through genetic mutation, including *KCNN2* and *ZBTB20*. *KCNN2* encodes a voltage-independent potassium channel activated by intracellular calcium, and is thought to regulate neuronal excitability and synaptic transmission (Willis et al., 2017; Adelman et al., 2012; Ballesteros-Merino et al., 2012; Lin et al., 2008). The role of *KCNN2* in homeostatic plasticity, through dysregulation of neuronal excitability (Raghuram et al., 2017), may explain its link to NDDs. Similarly, *ZBTB20*, which encodes a zinc finger protein with an essential role in LTP and memory formation through modulation of NMDA receptor activity and activation of ERK and CREB (Ren et al., 2012), may be linked to NDDs also through its role in homeostatic plasticity. In astrocytes, the NDD-linked gene *Camk2a* (Kury et al., 2017) was differentially expressed after neuronal activity suppression with TTX. *Camk2a* encodes a calcium calmodulin-dependent protein kinase II Alpha (CaMKII; Silva et al., 1992). Inhibition of CaMKII signaling in cortical astrocytes reduces glutamate uptake and induces neurotoxic release of ATP (Ashpole et al., 2013). NDD-linked genetic mutations in *Camk2a* might act through an altered astrocytic contribution to homeostatic plasticity, as glutamate uptake plays a critical role in regulating the strength and the extent of receptor activation at excitatory synapses (Valtcheva and Venance, 2019). Taken together, our data highlights that mechanisms of neurodevelopmental disorders may involve homeostatic plasticity-related gene functions.

**Supplemental tables (Table S1-3 were added as separate excel files)**

Table S4. List of qPCR primers.

| Gene name      | Direction | Primer sequence (5' to 3') |
|----------------|-----------|----------------------------|
| h <i>BDNF</i>  | forward   | GGATGAGGACCAGAAAGT         |
| h <i>BDNF</i>  | reverse   | AGCAGAAAGAGAAGAGGAG        |
| h <i>NPTX1</i> | forward   | CACCGAGGAGAGGGTCAAGAT      |
| h <i>NPTX1</i> | reverse   | CAGGGCGGTTGTCTTTCTGA       |
| h <i>PPIA</i>  | forward   | CATGTTTTCTTGTTCCCTCC       |
| h <i>PPIA</i>  | reverse   | CAACACTCTTAACTCAAACGAGGA   |

## Supplemental experimental procedures

### HiPSC line origin and generation information

Ctrl1 originated from fibroblasts of a 30-year old and healthy male doner (Mandegar et al., 2016; Miyaoka et al., 2014), and reprogrammed using episomal vector-based reprogramming of the Yamanaka transcription factors Oct4, c-Myc, Sox2, and Klf4 (Takahashi and Yamanaka, 2006), and was tested for genetic integrity using SNP assay (Frega et al., 2019). Ctrl2 was derived from fibroblasts of a 36-year-old and healthy female doner (Kondo et al., 2017; Okita et al., 2011), and reprogrammed using episomal vector-based reprogramming of the Yamanaka factors, showing no karyotypical malformations (Frega et al., 2019). Ctrl3 was previously derived from a healthy 51-year old male doner and reprogrammed using expression of Yamanaka factors by non-integrating Sendai virus, was tested for genomic integrity based on SNP array (Frega et al., 2019).

### Human iPSCs cell culture

HiPSCs were infected with Neurogenin-2 (Ngn2) and rtTA lentivirus. The vector utilized for generation of the rtTA lentivirus was pLVX-EF1 $\alpha$ -(Tet-On-Advanced)-IRES-G418(R), which encodes a Tet-On advanced trans-activator under control of a constitutive EEF1A/EF1 $\alpha$  promoter and has resistance to the antibiotic G418. The lentiviral vector for Ngn2 was pLVX-(TRE-tight)-(MOUSE)Ngn2-PGK-Puromycin(R), encoding Ngn2 under control of a Tet-controlled promoter and the puromycin resistance gene under control of a constitutive PGK promoter. Both vectors were being transfected and packaged into lentiviral particles through using the packaging vectors psPAX2 lentiviral packaging vector (Addgene, 12260) and pMD2.G lentiviral packaging vector (Addgene, 12259). Medium was supplemented with puromycin (0.5 g/mL) and G418 (50 g/mL). Medium was refreshed every other day, and cells were passaged 1-2 times per week using an enzyme-free reagent (ReLeSR; Stem Cell Technologies, 05872). Cells were checked for mycoplasma contamination every two weeks. Droplet digital PCR (ddPCR) was performed to test genome integrity.

### Neuronal differentiation

At DIV 1, the medium was changed to DMEM/F12 (Gibco, 11320074), which was supplemented with MEM non-essential amino acid solution NEAA (1:100, Sigma-Aldrich, M7145), N-2 Supplement (1:100, Gibco, 17502048), BDNF (10 ng/mL, PeproTech, 450-02), NT-3 (10 ng/mL, PeproTech, 450-03), doxycycline (4  $\mu$ g/mL, Sigma, D9891), Primocin (0.1 mg/mL, Invivogen, ant-pm-2), and mouse laminin (0.2 mg/mL, Sigma-Aldrich, L2020). At DIV 2, freshly prepared rat astrocytes were added, in a 1:1 ratio, in order to support neuronal maturation. At DIV 3, the medium was fully changed to Neurobasal medium (Gibco, 21103049), which was supplemented with B-27 Supplement (1:50, Gibco, 17504044), GlutaMAX (1:100, Gibco, 35050038), Primocin (0.1 mg/mL, Invivogen, ant-pm-2), NT-3 (10 ng/mL, PeproTech, 450-03), BDNF (10 ng/mL, PeproTech, 450-02), and doxycycline (4  $\mu$ g/mL). Cytosine  $\beta$ -D-arabinofuranoside (Ara-C, 2  $\mu$ M, Sigma-Aldrich, C1768) was added once to remove proliferating cells from the cultures. From DIV 6 onwards, medium was 50% refreshed every other day. From DIV 10 onwards, the medium was additionally supplemented with 2.5% fetal bovine serum (FBS, Sigma, F2442) to support astrocyte viability. Neurons were differentiated to glutamatergic neurons by overexpression of Ngn2 until DIV 30 or DIV 49.

### Procedure for TTX treatment and TTX withdrawal on MEA plates

At DIV 48, 50% pre-conditioned untreated culture medium was collected, and medium was then 50% refreshed. Specifically, 250  $\mu$ L of the spent medium was collected in a 15 mL tube and stored at 4°C. Of the freshly prepared medium, 250  $\mu$ L was added to cells. At DIV 49, a first MEA recording was performed by using the 24-well MEA system (Multichannel Systems, MCS GmbH, Reutlingen, Germany). After the MEA recording, 1  $\mu$ M tetrodotoxin (TTX, Tocris, 1069) was added to certain wells. Five to ten min later, a MEA recording was performed again. The MEA plate was placed back to the incubator and incubated at 37°C, 5% CO<sub>2</sub> for a specified number of hours (12, 24, 36, or 48 h). After that time, TTX was removed. Briefly, a first MEA recording was performed. All the spent medium was then aspirated. This washing step was repeated three times, in order to remove TTX completely. Then, 50% pre-conditioned untreated culture medium and 50% fresh medium were immediately added to the cells. At the last step, MEA recording was performed again. MEA plates were kept in the recording chamber for a longer measurement.

### Immunocytochemistry

For the surface GluA2 staining and axon initial segment staining, neurons were fixed 48 h after TTX treatment at DIV 49. To ensure extracellular staining and prevent intracellular staining,

permeabilization was not performed when using anti-GluA2. The primary antibodies that were used are: Mouse anti-GluA1 (1:300, Sigma-Aldrich ABN241); Mouse anti-GluA2 (1:500, Invitrogen 32-0300); Mouse anti-Homer1 (1:300, Synaptic Systems 160 011); Rabbit anti-MAP2 (1:1000, Abcam, #ab32454); Guinea pig anti-Synapsin 1/2 (1:1000, Synaptic Systems 106004); Mouse anti-Ankyrin G (1:200, Invitrogen 33-8800). The secondary antibodies that were used are: Goat-anti-mouse Alexa 488 (1:1000, Invitrogen A11029); Goat anti-Rabbit Alexa Fluor 488 (1:1000, Invitrogen A11034); Goat anti-Guinea Pig Alexa Fluor 568 (1:1000, Invitrogen A11075); Goat anti-Mouse Alexa Fluor 568 (1:1000, Invitrogen A11031); Goat anti-Rabbit Alexa Fluor 647 (1:1000, Invitrogen A21245). Cells were imaged at 63x magnification using the Zeiss Axio Imager Z1 equipped with ApoTome. All conditions within a batch were acquired with the same settings in order to compare signal intensities between different experimental conditions. Fluorescent images were analysed using FIJI software. The number of GluA2 puncta was determined per individual cell via manual counting and divided by the dendritic length of the neuron. AIS start and end positions were obtained at the proximal and distal axonal positions.

### **Chemicals**

TTX and 1-naphthyl acetyl spermine trihydrochloride (NASPM) were freshly prepared into concentrated stocks and stored frozen at  $-20^{\circ}\text{C}$ . TTX was dissolved in distilled water (1 mM, Tocris 1069); NASPM was dissolved in distilled water (100 mM, Tocris 2766). For NASPM experiments on MEAs, immediately before adding NASPM to the cells, an aliquot of the concentrated stock was first diluted 1:100 at room temperature in Dulbecco's phosphate-buffered saline (DPBS) and vortexed briefly. Then, the appropriate amount of working dilution (1:100, the final concentration of NASPM was 1  $\mu\text{M}$ ) was added directly to wells on the MEA after cells were refreshed with 50% pre-conditioned untreated culture medium and 50% fresh medium, and mixing was primarily through diffusion into the cell culture medium.

### **MEA recordings and data analysis**

Briefly, spontaneous electrophysiological activity of hiPSC-derived neurons grown on MEAs was recorded for 10 min. Before recording, MEA plates were in exploring status for 10 min, in order to adapt in the recording chamber. After 10 min, recording started. During the recording, the temperature was maintained constantly at  $37^{\circ}\text{C}$ , and the evaporation and pH changes of the medium were prevented by inflating a constant, slow flow of humidified gas (5%  $\text{CO}_2$  and 95%  $\text{O}_2$ ) onto the MEA plates (with the lid on). The signal was sampled at 10 kHz, filtered with a high-pass filter (i.e., Butterworth, 100 Hz cutoff frequency), and the noise threshold was set at  $\pm 4.5$  standard deviations.

Data analysis was performed off-line by using the Multi-well Analyzer (i.e., software from the 24-well MEA system that allows the extraction of the spike trains) and a custom-made MATLAB (The Mathworks, Natick, MA, USA) code that allows the extraction of parameters describing the network activity. Mean firing rate (MFR) was defined as the average of the spike frequency of all 12 channels across one well of the MEA plate. For the burst detection, the number of bursting channels (above threshold 0.4 burst/s and at least 5 spikes in one burst with a minimal inter-burst-interval of 100 ms) was determined. A network burst was called when at least half of the channels in one well presented a synchronous burst.

### **Whole cell patch clamp**

Whole cell patch clamp was performed as previously described (Mossink et al., 2022). Vehicle treated- or 48 h TTX-exposed coverslips were placed in the recording chamber, continuously perfused with oxygenated (95%  $\text{O}_2$ / 5%  $\text{CO}_2$ ) artificial cerebrospinal fluid (ACSF) at  $32^{\circ}\text{C}$  containing (in mM) 124 NaCl, 1.25  $\text{NaH}_2\text{PO}_4$ , 3 KCl, 26  $\text{NaHCO}_3$ , 11 Glucose, 2  $\text{CaCl}_2$ , and 1  $\text{MgCl}_2$ . Patch pipettes with filament (ID 0.86 mm, OD1.05 mm, resistance 6-8  $\text{M}\Omega$ ) were pulled from borosilicate glass (Science Products GmbH, Hofheim, Germany) using a Narishige PC-10 micropipette puller (Narishige, London, UK). For all recordings, a potassium-based intracellular solution containing (in mM) 130 K-Gluconate, 5 KCl, 10 HEPES, 2.5  $\text{MgCl}_2$ , 4 Na<sub>2</sub>-ATP, 0.4 Na<sub>3</sub>-ATP, 10 Na-phosphocreatine, and 0.6 EGTA was used, with a pH of 7.2 and osmolality of 290 mOsmol/L. Miniature postsynaptic currents (mEPSCs) were measured in ACSF containing 1  $\mu\text{M}$  TTX. Cells were visualized with an Olympus BX51WI upright microscope (Olympus Life Science, PA, USA), equipped with a DAGE-MTI IR-1000E (DAGE-MTI, IN, USA) camera. A Digidata 1440A digitizer and a Multiclamp 700B amplifier (Molecular Devices) were used for data acquisition. Data was acquired at 10 kHz (mEPSCs), and a lowpass 1 kHz filter was used during recording. Recordings were not corrected for liquid junction potential ( $\pm 10$  mV), and they were discarded if series resistance reached  $>25$   $\text{M}\Omega$  or dropped below a 10:0 ratio of  $R_m$  to  $R_s$ . mEPSCs were analysed using MiniAnalysis 6.0.2 (Synaptosoft Inc, GA, USA).

## RNA-Sequencing

RNA from three biological replicates of vehicle-treated (Veh) and 48 h-TTX-treated (TTX) neurons (6 samples in total) were isolated using Quick-RNA Microprep kit (Zymo Research, R1051) according to the instructions of manufacturer. RNA quality was assessed using Agilent's TapeStation system (RNA High Sensitivity ScreenTape and Reagents, 5067–5579/80). RNA integrity number (RIN) values of all samples ranged between 8.3 and 8.7. Library preparation and paired-end RNA-sequencing were performed at CNAG-CRG, Centre for Genomic Regulation (CRG) (<https://www.cnag.crg.eu/>). Briefly, the RNA-Seq libraries were prepared with KAPA Stranded mRNA-Seq Illumina® Platforms Kit (Roche) starting from 500 ng of total RNA. The poly-A fraction enrichment was performed with oligo-dT magnetic beads, followed by the mRNA fragmentation. The strand specificity was achieved during the second strand synthesis performed in the presence of dUTP instead of dTTP. The blunt-ended double stranded cDNA was 3'adenylated, and Illumina platform-compatible adaptors with unique dual indexes and unique molecular identifiers (Integrated DNA Technologies) were ligated. The ligation product was enriched with 15 polymerase chain reaction (PCR) cycles. The libraries were sequenced on NovaSeq6000 (Illumina) in paired-end following the manufacturer's protocol for dual indexing. Image analysis, base calling, and quality scoring of the run were processed using the manufacturer's software Real Time Analysis, followed by generation of FASTQ sequence files.

## RNA-Seq data processing

Raw count matrices were loaded in R v4.2.1. For Ensemble IDs that mapped to same gene symbols, we only considered the IDs with highest expression per sample. Then, count data were normalized using size factors method of DESeq2 (Love et al., 2014), and lowly expressed genes (< 15 normalized counts in three or more samples) were filtered. Principal component analysis was performed on variance-stabilized transformed counts, and differential expression analysis was performed with DESeq2 using lfcShrink and "apeglm" method (Love et al., 2014). Genes were considered differentially expressed if TTX-treatment induced a  $\text{Log}_2\text{FC} > 0.58$ , with a false discovery rate (FDR)-adjusted P value < 0.05. Hierarchical clustering of the samples based on differentially expressed genes (DEGs) was performed with heatmap.2 function of gplots v3.1.3R package, using the Euclidean distance and "ward.D2" clustering method. Gene ontology (GO) enrichment analysis was performed on highly and lowly expressed genes after TTX-treatment independently, using the gost function of the R package gprofiler2 v0.2.1. Redundancy of enriched GO terms was accounted for with clustering analysis and aggregating terms with high semantic similarity, using the functions calculateSimMatrix and reduceSimMatrix with threshold=0.7 of the rrvgo v1.2.0 R package. We tested whether DEGs induced by TTX treatment were enriched for genes related to neurodevelopmental disorders (NDDs) and confident autism-related genes (Fu et al., 2022; Leblond et al., 2021), using one-tailed Fisher's exact test and adjusting P values with the FDR method. All plots were generated with custom code based on ggplot2 v.3.4.0 functions in R.

## Gene expression analysis

Co-cultures of hiPSC-derived neurons and rat astrocytes were treated with or without 1  $\mu\text{M}$  TTX (Tocris, 1069) at DIV 49 and harvested at DIV 51. RNA samples of vehicle- and TTX-treated conditions were isolated using Quick-RNA Microprep kit (Zymo Research, R1051) according to manufacturer's instructions. 1  $\mu\text{g}$  RNA was retro-transcribed into complementary strand of DNA (cDNA) by the iScript cDNA Synthesis Kit (Bio-Rad Laboratories, 1708891) according to the manufacturer's instructions. Quantitative real-time PCR (qRT-PCR) reactions were performed in QuantStudio Real-Time PCR systems by using GoTaq qPCR master mix 2x with SYBR Green (Promega, A6002) according to the manufacturer's protocol. We used human specific reference gene (*PPIA*) for our gene expression analyses. Used qRT-PCR primers were listed in Table S4. All samples were analyzed in triple in the same plate and placed in adjacent wells. Reverse transcriptase-negative controls and no template-controls were included in our procedures. The Ct value of every target gene was normalized against the Ct value of the reference genes [ $\Delta\text{Ct} = [\text{Ct}(\text{target}) - \text{Ct}(\text{PPIA})]$ ]. The relative gene expression was calculated as  $2^{-\Delta\Delta\text{Ct}}$  and used as fold change of gene expression when compared to corresponding control conditions [ $2^{-\Delta\Delta\text{Ct}} = 2^{\Delta\text{Ct}(\text{target}) - \Delta\text{Ct}(\text{control})}$ ].

## Cross correlation

We implemented a Cross-Correlation (CC) script in Matlab using a common normalization factor (Eytan et al., 2004). Connectivity matrices were obtained by analysing the correlograms in a time window of 300 ms and using a 0.2 ms bin. In order to eliminate the contribution of spurious connections, a threshold (i.e., average of the weights of the total connections plus 2 times the value of the standard deviation) was applied. For each matrix the total number of links and their average weight have been calculated.

The total number of links: the number of functional connections within the nodes of the same network.  
The link weight: the average strength of the identified connections.

#### **NBQX treatment procedure**

In the experimental procedure involving the treatment of MEAs with NBQX (50  $\mu$ M, Tocris #0373), prior to adding NBQX to the cells, the concentrated stock solution was diluted 1:10 in DPBS at room temperature and subjected to brief vortexing. Subsequently, certain volume of the resulting working dilution was directly added to the wells on the MEA, where the diffusion process facilitated its mixing into the 500  $\mu$ L cell culture medium.

## Supplemental references

- Adelman, J.P., Maylie, J., and Sah, P. (2012). Small-conductance Ca<sup>2+</sup>-activated K<sup>+</sup> channels: form and function. *Annu Rev Physiol* 74, 245-269. 10.1146/annurev-physiol-020911-153336.
- Ashpole, N.M., Chawla, A.R., Martin, M.P., Brustovetsky, T., Brustovetsky, N., and Hudmon, A. (2013). Loss of calcium/calmodulin-dependent protein kinase II activity in cortical astrocytes decreases glutamate uptake and induces neurotoxic release of ATP. *J Biol Chem* 288, 14599-14611. 10.1074/jbc.M113.466235.
- Ballesteros-Merino, C., Lin, M., Wu, W.W., Ferrandiz-Huertas, C., Cabanero, M.J., Watanabe, M., Fukazawa, Y., Shigemoto, R., Maylie, J., Adelman, J.P., and Lujan, R. (2012). Developmental profile of SK2 channel expression and function in CA1 neurons. *Hippocampus* 22, 1467-1480. 10.1002/hipo.20986.
- Eytan, D., Minerbi, A., Ziv, N., and Marom, S. (2004). Dopamine-induced dispersion of correlations between action potentials in networks of cortical neurons. *J Neurophysiol* 92, 1817-1824. 10.1152/jn.00202.2004.
- Frega, M., Linda, K., Keller, J.M., Gumus-Akay, G., Mossink, B., van Rhijn, J.R., Negwer, M., Klein Gunnewiek, T., Foreman, K., Kompier, N., et al. (2019). Neuronal network dysfunction in a model for Kleefstra syndrome mediated by enhanced NMDAR signaling. *Nat Commun* 10, 4928. 10.1038/s41467-019-12947-3.
- Kondo, T., Imamura, K., Funayama, M., Tsukita, K., Miyake, M., Ohta, A., Woltjen, K., Nakagawa, M., Asada, T., Arai, T., et al. (2017). iPSC-Based Compound Screening and In Vitro Trials Identify a Synergistic Anti-amyloid beta Combination for Alzheimer's Disease. *Cell Rep* 21, 2304-2312. 10.1016/j.celrep.2017.10.109.
- Koopmans, F., van Nierop, P., Andres-Alonso, M., Byrnes, A., Cijssouw, T., Coba, M.P., Cornelisse, L.N., Farrell, R.J., Goldschmidt, H.L., Howrigan, D.P., et al. (2019). SynGO: An Evidence-Based, Expert-Curated Knowledge Base for the Synapse. *Neuron* 103, 217-234 e214. 10.1016/j.neuron.2019.05.002.
- Kury, S., van Woerden, G.M., Besnard, T., Proietti Onori, M., Latypova, X., Towne, M.C., Cho, M.T., Prescott, T.E., Ploeg, M.A., Sanders, S., et al. (2017). De Novo Mutations in Protein Kinase Genes CAMK2A and CAMK2B Cause Intellectual Disability. *Am J Hum Genet* 101, 768-788. 10.1016/j.ajhg.2017.10.003.
- Lin, M.T., Lujan, R., Watanabe, M., Adelman, J.P., and Maylie, J. (2008). SK2 channel plasticity contributes to LTP at Schaffer collateral-CA1 synapses. *Nat Neurosci* 11, 170-177. 10.1038/nn2041.
- Love, M.I., Huber, W., and Anders, S. (2014). Moderated estimation of fold change and dispersion for RNA-seq data with DESeq2. *Genome Biol* 15, 550. 10.1186/s13059-014-0550-8.
- Mandegar, M.A., Huebsch, N., Frolov, E.B., Shin, E., Truong, A., Olvera, M.P., Chan, A.H., Miyaoka, Y., Holmes, K., Spencer, C.I., et al. (2016). CRISPR Interference Efficiently Induces Specific and Reversible Gene Silencing in Human iPSCs. *Cell Stem Cell* 18, 541-553. 10.1016/j.stem.2016.01.022.
- Miyaoka, Y., Chan, A.H., Judge, L.M., Yoo, J., Huang, M., Nguyen, T.D., Lizarraga, P.P., So, P.L., and Conklin, B.R. (2014). Isolation of single-base genome-edited human iPS cells without antibiotic selection. *Nat Methods* 11, 291-293. 10.1038/nmeth.2840.
- Mossink, B., van Rhijn, J.R., Wang, S., Linda, K., Vitale, M.R., Zoller, J.E.M., van Hugte, E.J.H., Bak, J., Verboven, A.H.A., Selten, M., et al. (2022). Cadherin-13 is a critical regulator of GABAergic modulation in human stem-cell-derived neuronal networks. *Mol Psychiatry* 27, 1-18. 10.1038/s41380-021-01117-x.
- Okita, K., Matsumura, Y., Sato, Y., Okada, A., Morizane, A., Okamoto, S., Hong, H., Nakagawa, M., Tanabe, K., Tezuka, K., et al. (2011). A more efficient method to generate integration-free human iPS cells. *Nat Methods* 8, 409-412. 10.1038/nmeth.1591.
- Raghuram, V., Weber, S., Raber, J., Chen, D.H., Bird, T.D., Maylie, J., and Adelman, J.P. (2017). Assessment of mutations in KCNN2 and ZNF135 to patient neurological symptoms. *Neuroreport* 28, 375-379. 10.1097/WNR.0000000000000754.
- Silva, A.J., Paylor, R., Wehner, J.M., and Tonegawa, S. (1992). Impaired spatial learning in alpha-calmodulin kinase II mutant mice. *Science* 257, 206-211. 10.1126/science.1321493.
- Takahashi, K., and Yamanaka, S. (2006). Induction of pluripotent stem cells from mouse embryonic and adult fibroblast cultures by defined factors. *Cell* 126, 663-676. 10.1016/j.cell.2006.07.024.
- Valtcheva, S., and Venance, L. (2019). Control of Long-Term Plasticity by Glutamate Transporters. *Front Synaptic Neurosci* 11, 10. 10.3389/fnsyn.2019.00010.
- Willis, M., Trieb, M., Leitner, I., Wietzorrek, G., Marksteiner, J., and Knaus, H.G. (2017). Small-conductance calcium-activated potassium type 2 channels (SK2, KCa2.2) in human brain. *Brain Struct Funct* 222, 973-979. 10.1007/s00429-016-1258-1.
